# Supplementary material for: Identification of novel HPFH-like mutations by CRISPR base editing that elevate the expression of fetal hemoglobin
Source: eLife journal article supplement (doi:10.7554/elife.65421), 2022-02-11
Supplement: supp [file elife-65421-supp-v1.zip]

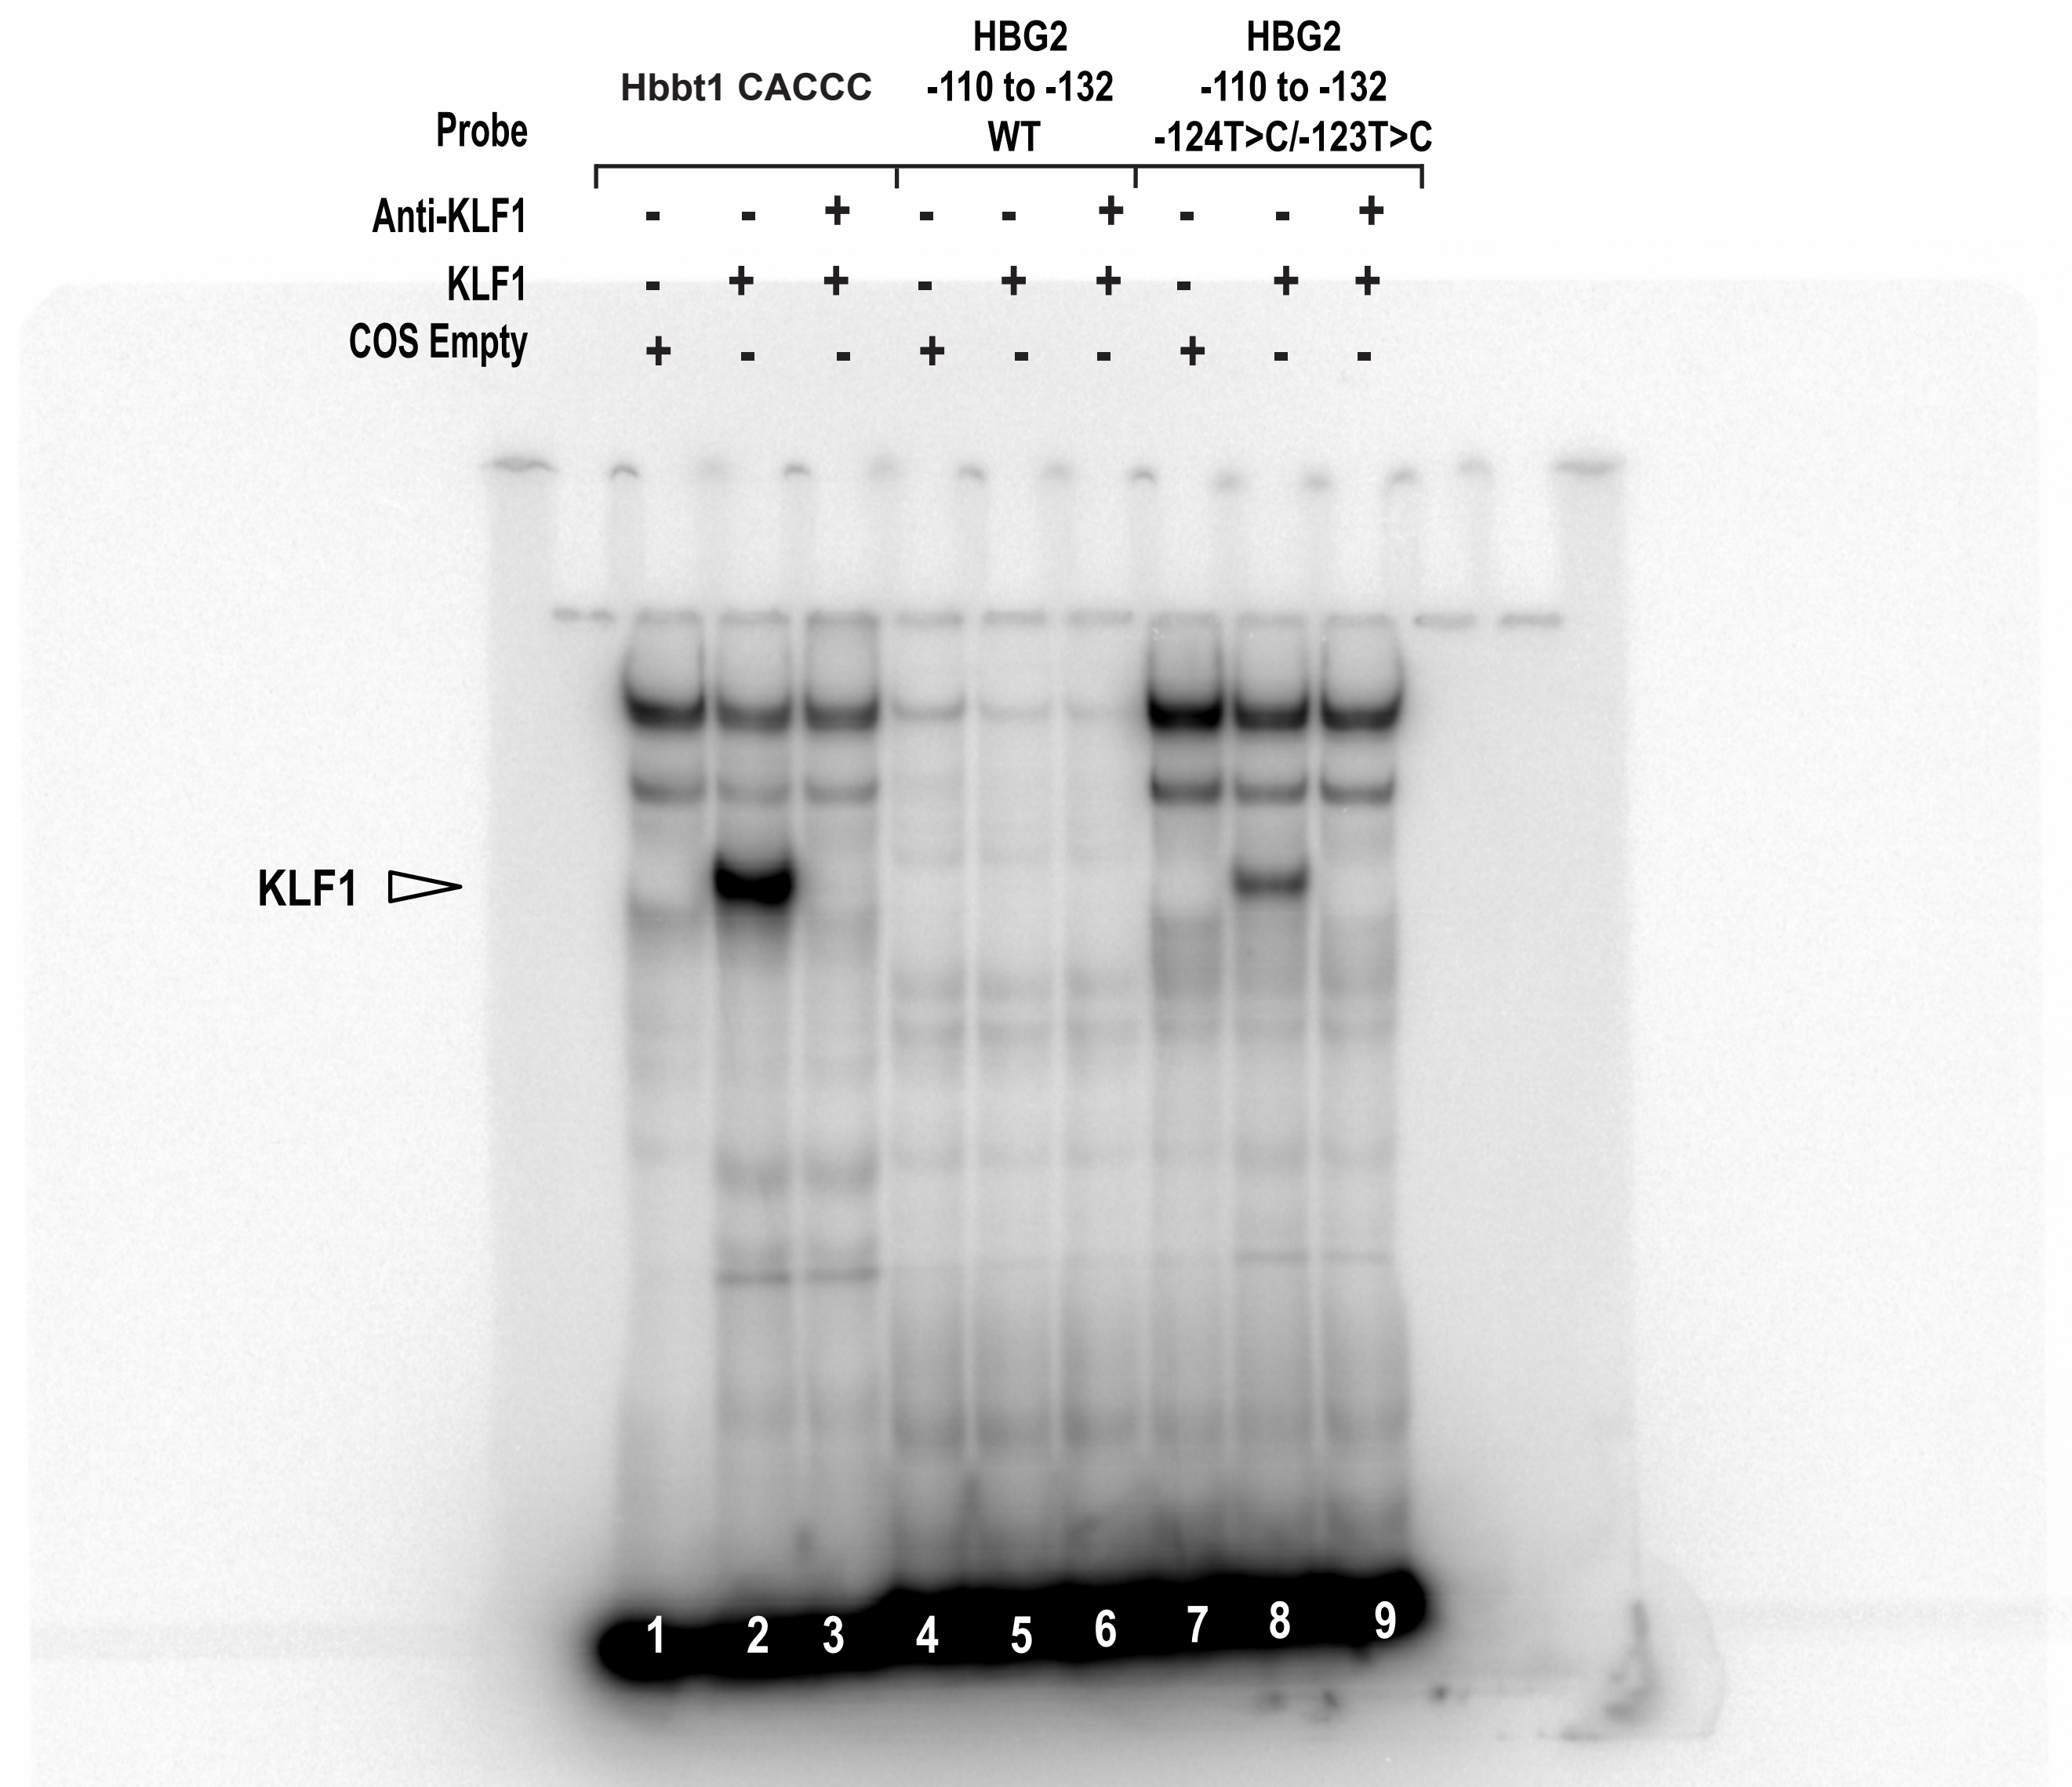

EMSA showing the binding of KLF1 to the -123T>C/-124T>C probe but fails to bind to a WT probe containing the -123/-124 region of the HBG promoter in-vitro. Lanes 1-3 contain the Hbbt1-CACCC as positive control, lanes 4-6 contain the WT probe for the -123, -124 site (-132 to -110 bp) and lanes 7-9 contain the HPGH -123/-124T>C mutant probe. Lanes 1, 4 and 7 contain nuclear extracts from COS cells transfected with a pcDNA3 empty vector. Lanes 2-3, 5-6 and 8-9 contain nuclear extracts from COS cells overexpressing KLF1. Binding of KLF1 to the -123/-124T>C HPGH mutant probe can be observed in lane 8, with a super shift of KLF1 with an anti-KLF1 antibody in lane 9.
