# Supplementary material for: Identification of novel HPFH-like mutations by CRISPR base editing that elevate the expression of fetal hemoglobin
Source: eLife journal article supplement (doi:10.7554/elife.65421), 2022-02-11
Supplement: supp [file elife-65421-supp-v1.zip]

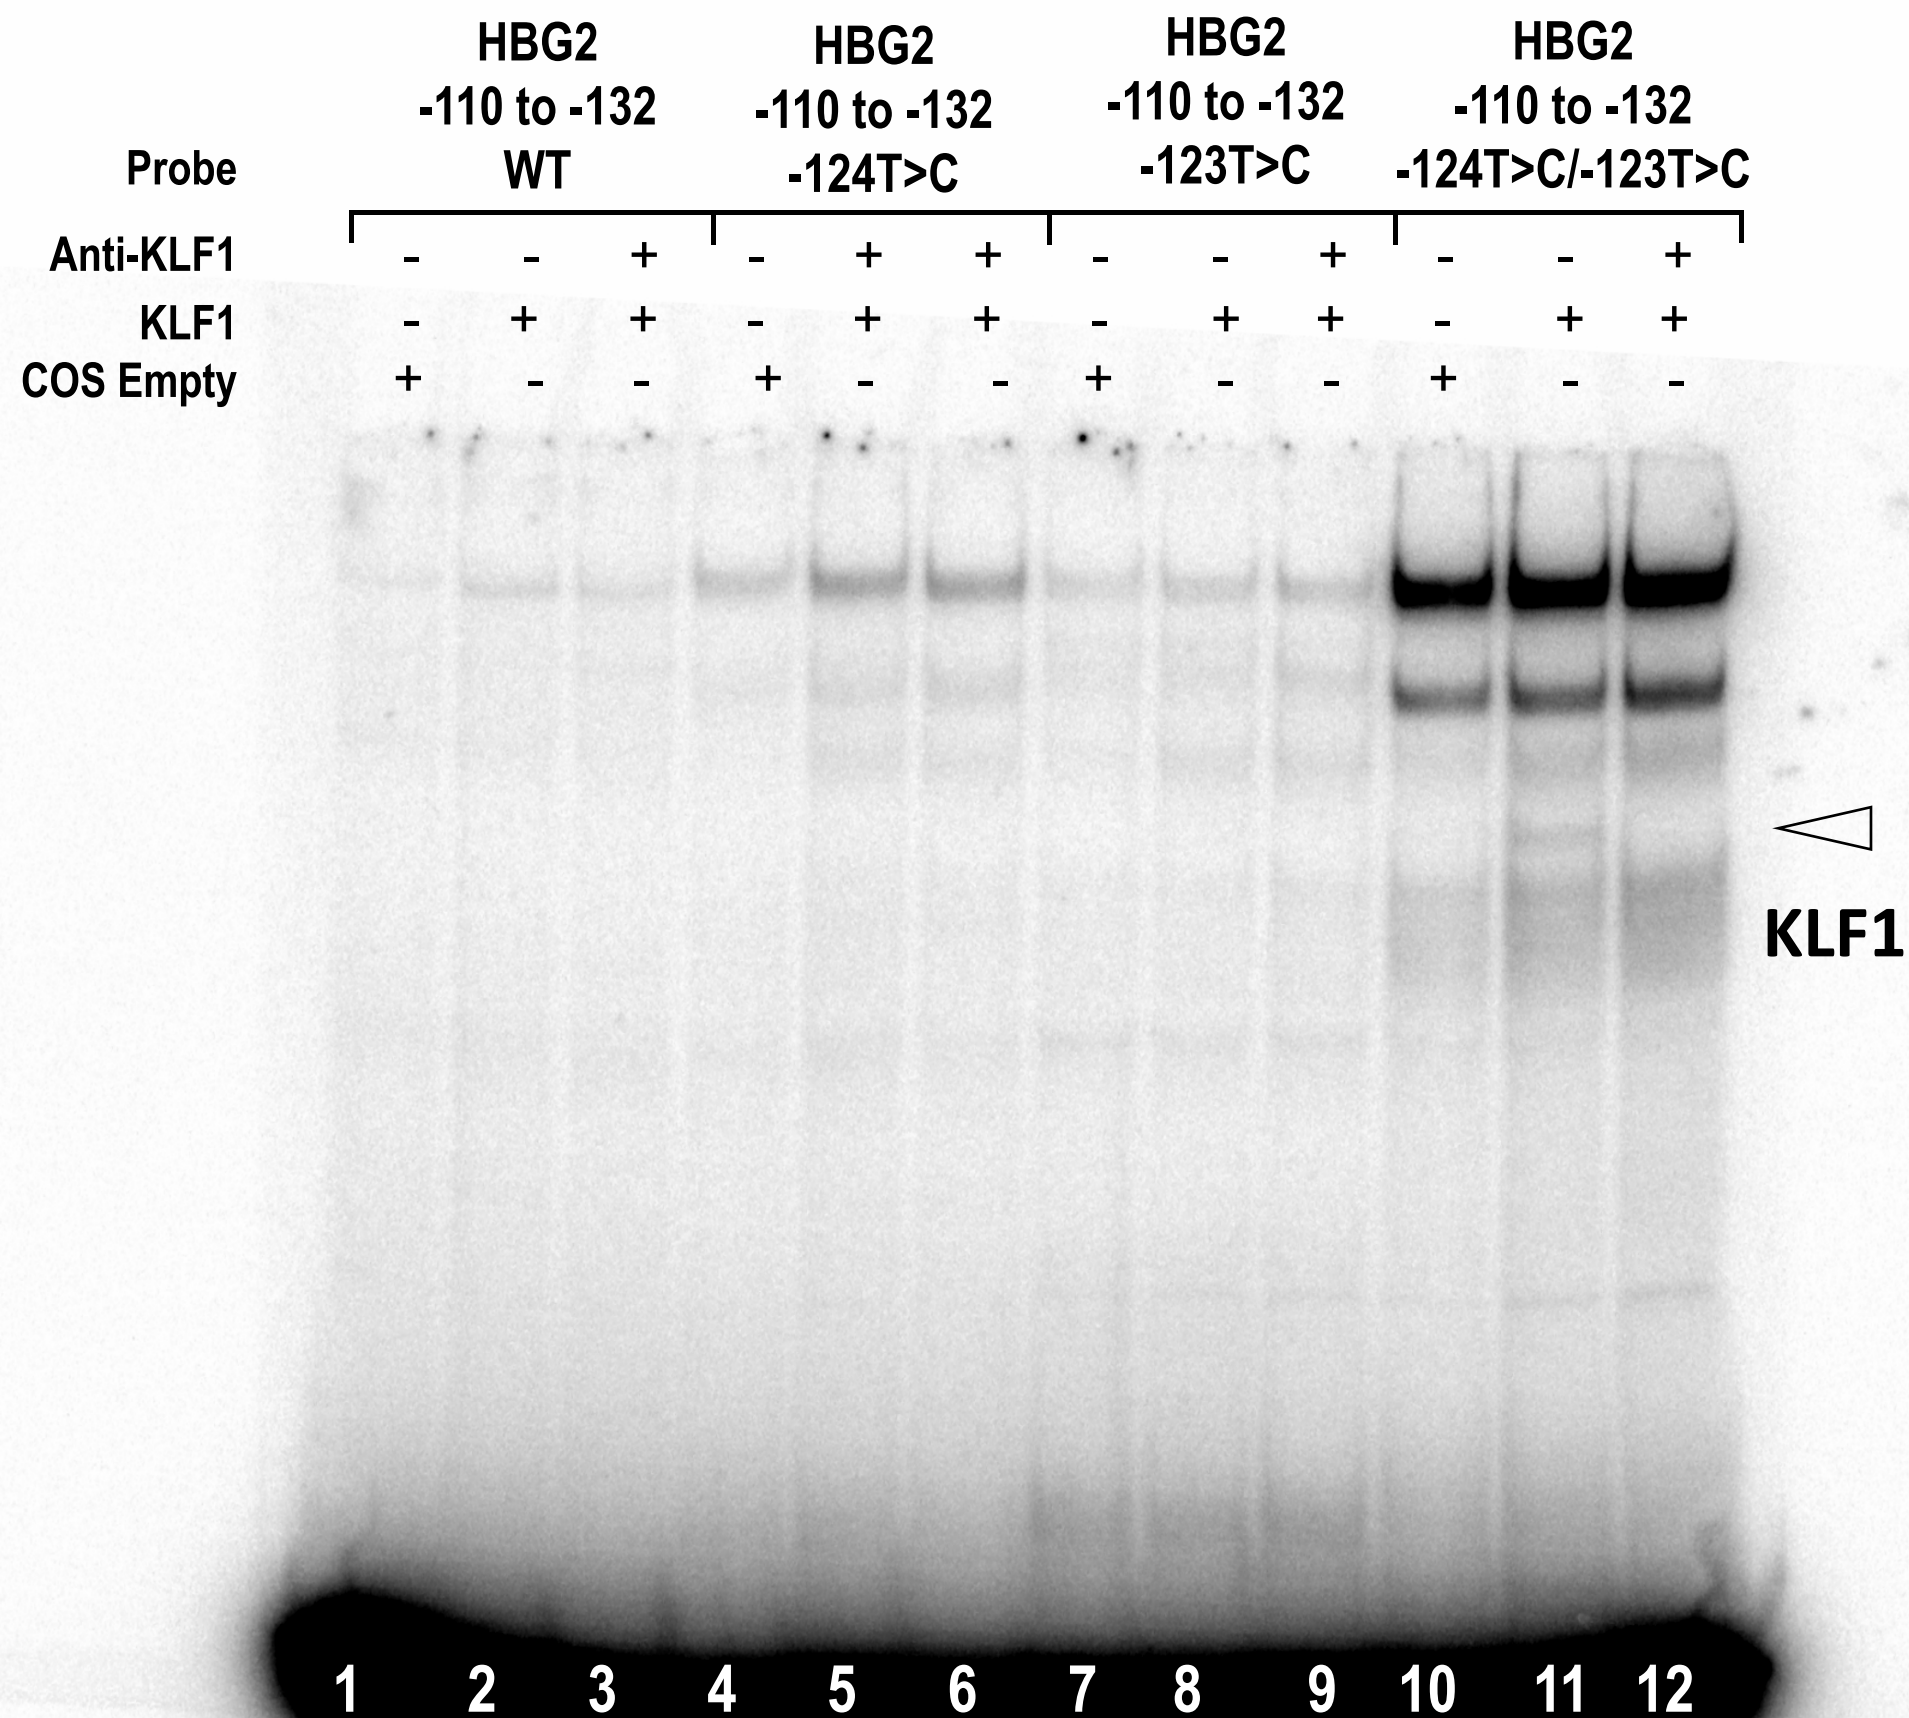

EMSA showing KLF1 binding to -123T>C/-124T>C probe but failing to bind to -124 T>C probe, -123T>C probe and WT probe with the -123 T/-124 T region of the HBG promoter in vitro. Lanes 1, 4, 7 and 10 contain nuclear extracts from COS cells transfected with a pcDNA3 empty vector. Lanes 2-3, 5-6, 8-9 and 11-12 contain nuclear extracts from COS cells overexpressing KLF1. Binding of KLF1 to the -123T>C/-124T>C HPFH mutant probe can be observed in lane 11, with a super shift of KLF1 in the presence of anti-KLF1 antibody in lane 12.
