# Supplementary figures and images for: Identification of novel HPFH-like mutations by CRISPR base editing that elevate the expression of fetal hemoglobin
Source: eLife journal article supplement (doi:10.7554/elife.65421), 2022-02-11

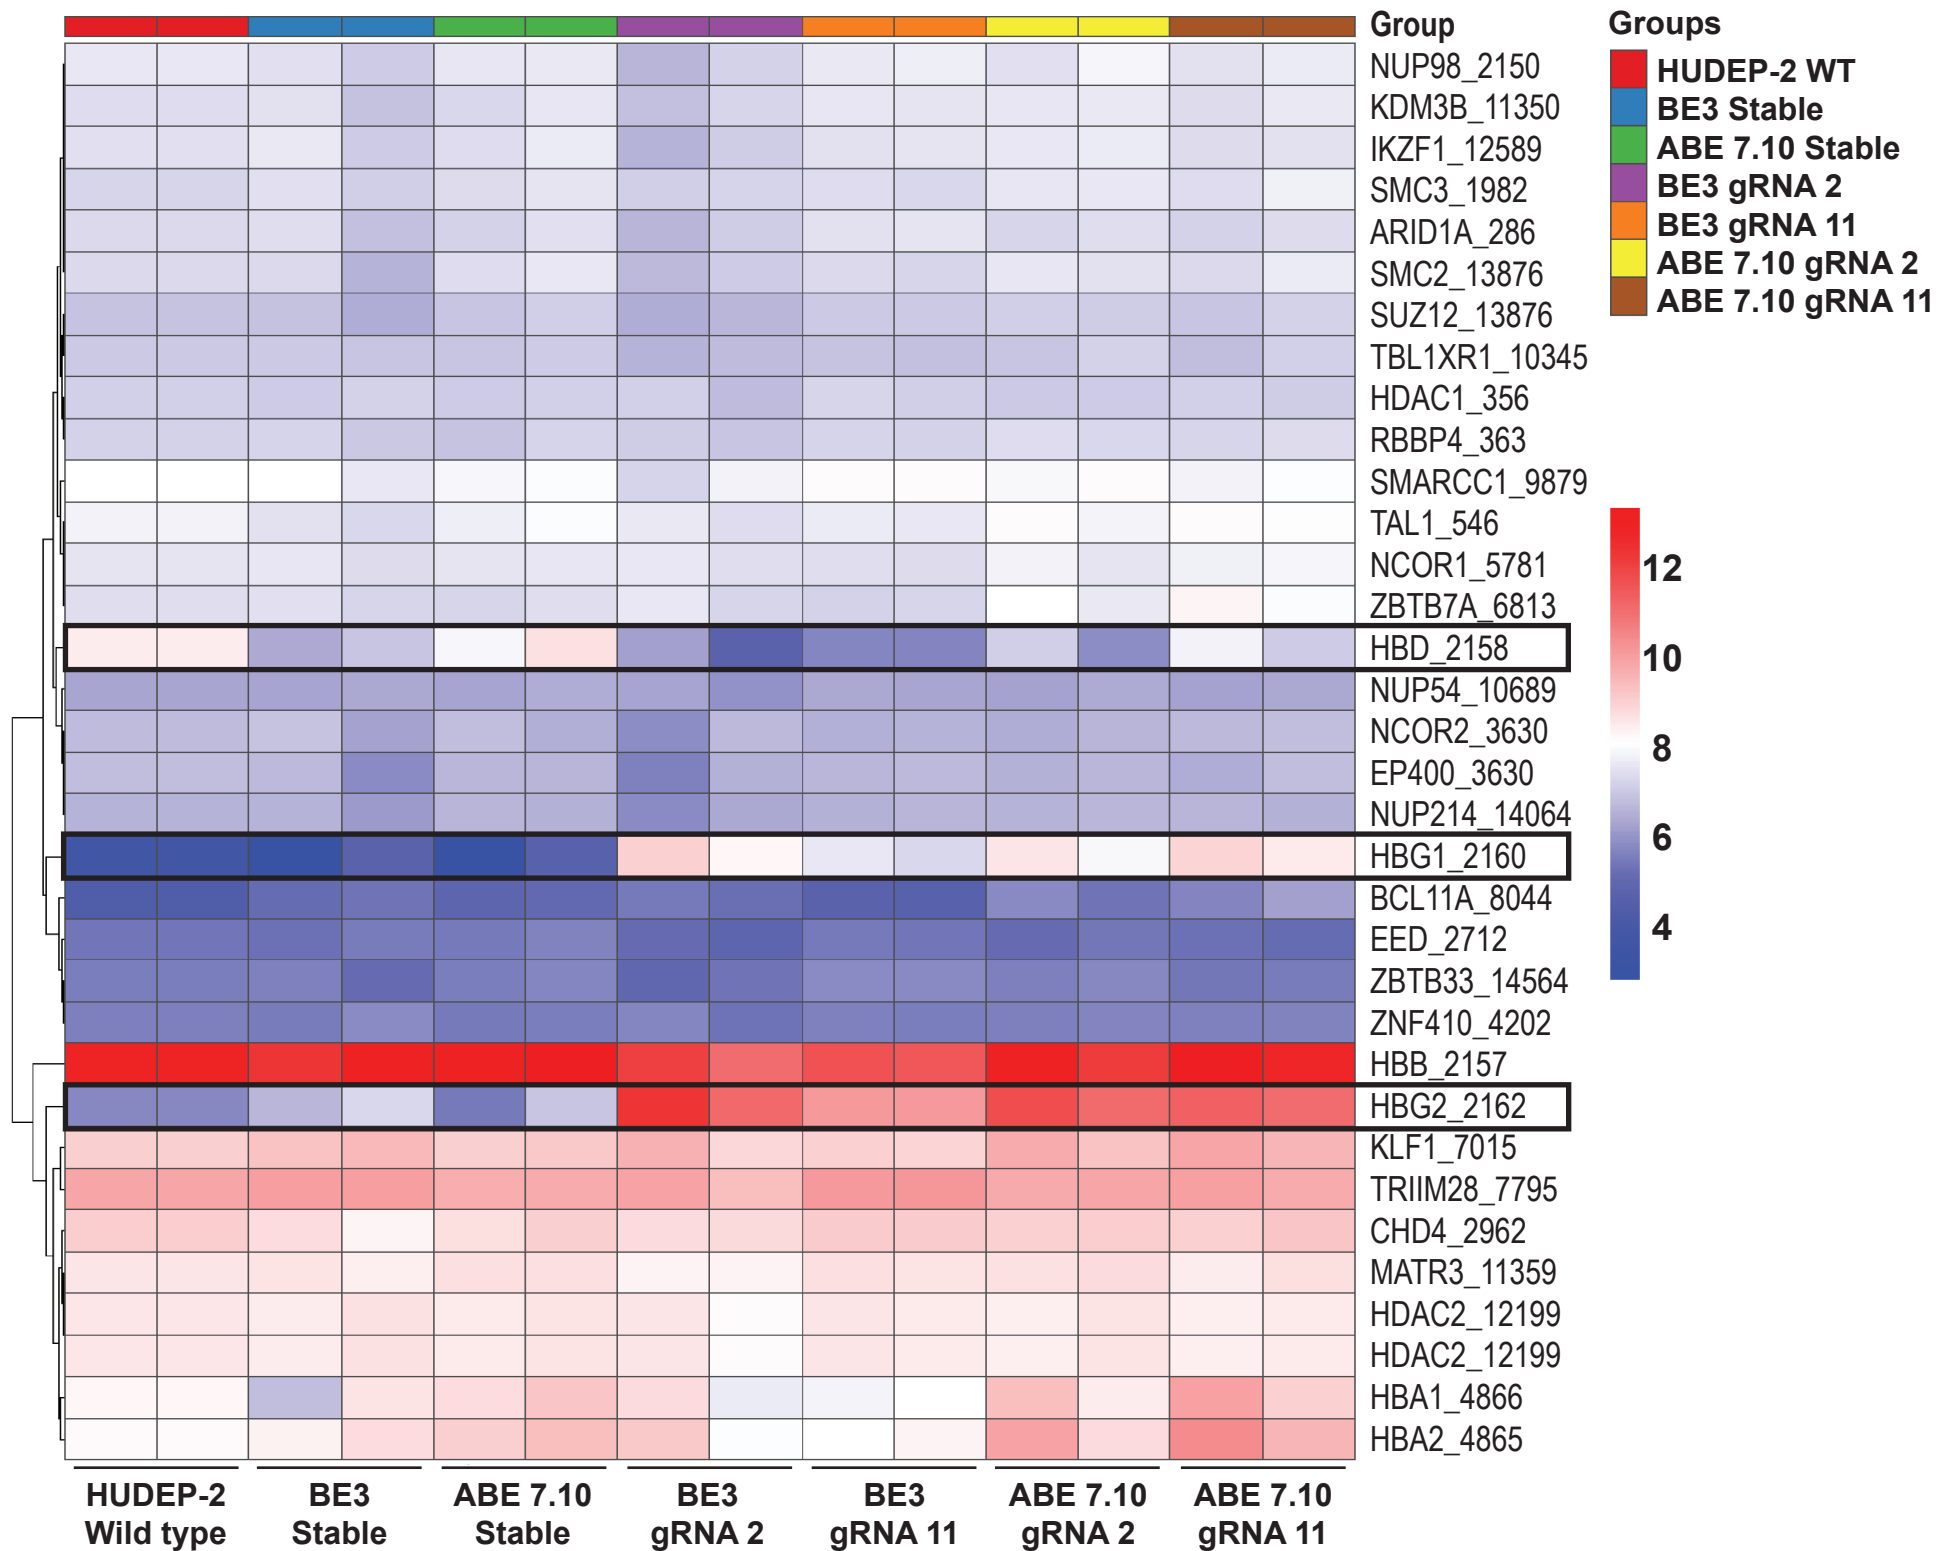

Supplement: supp [file elife-65421-supp-v1.zip]

a)

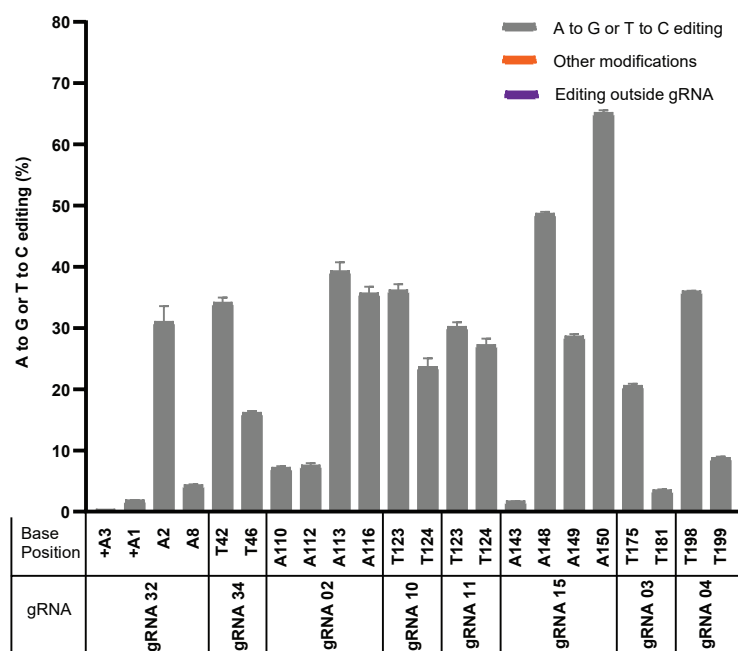

c)

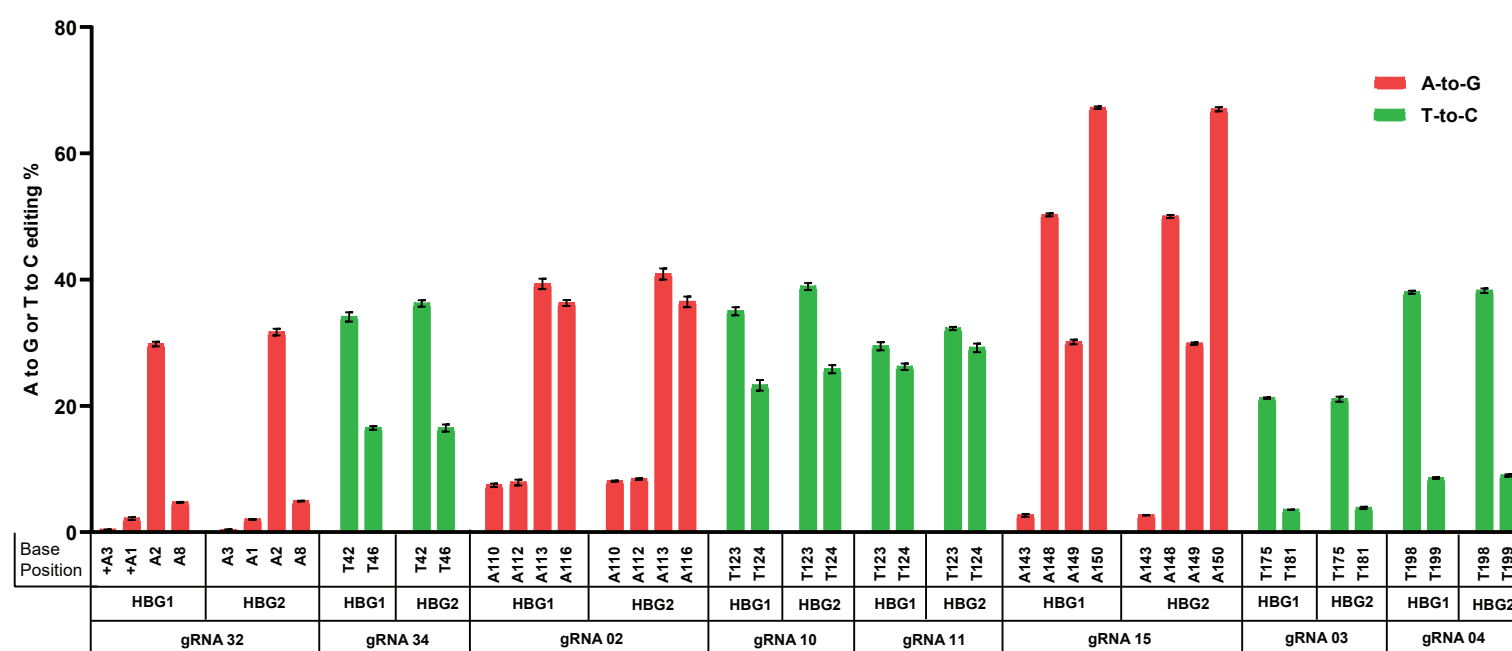

b)

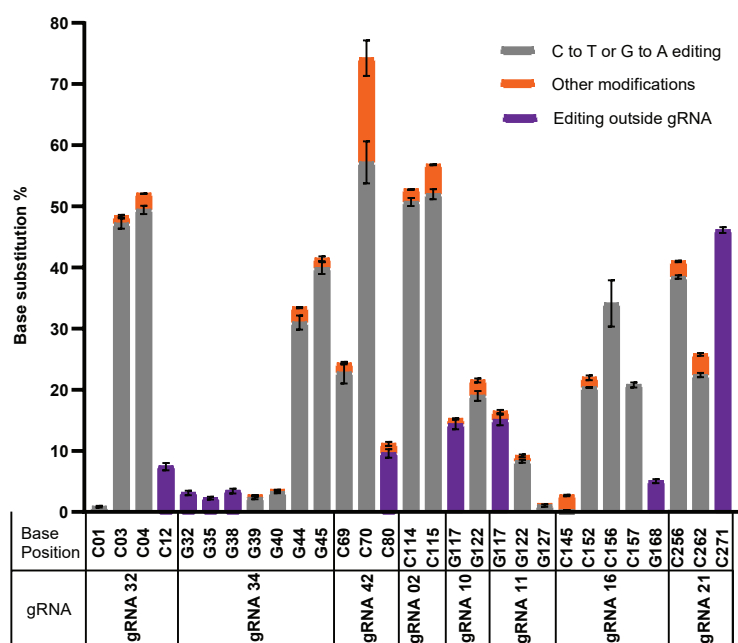

d)

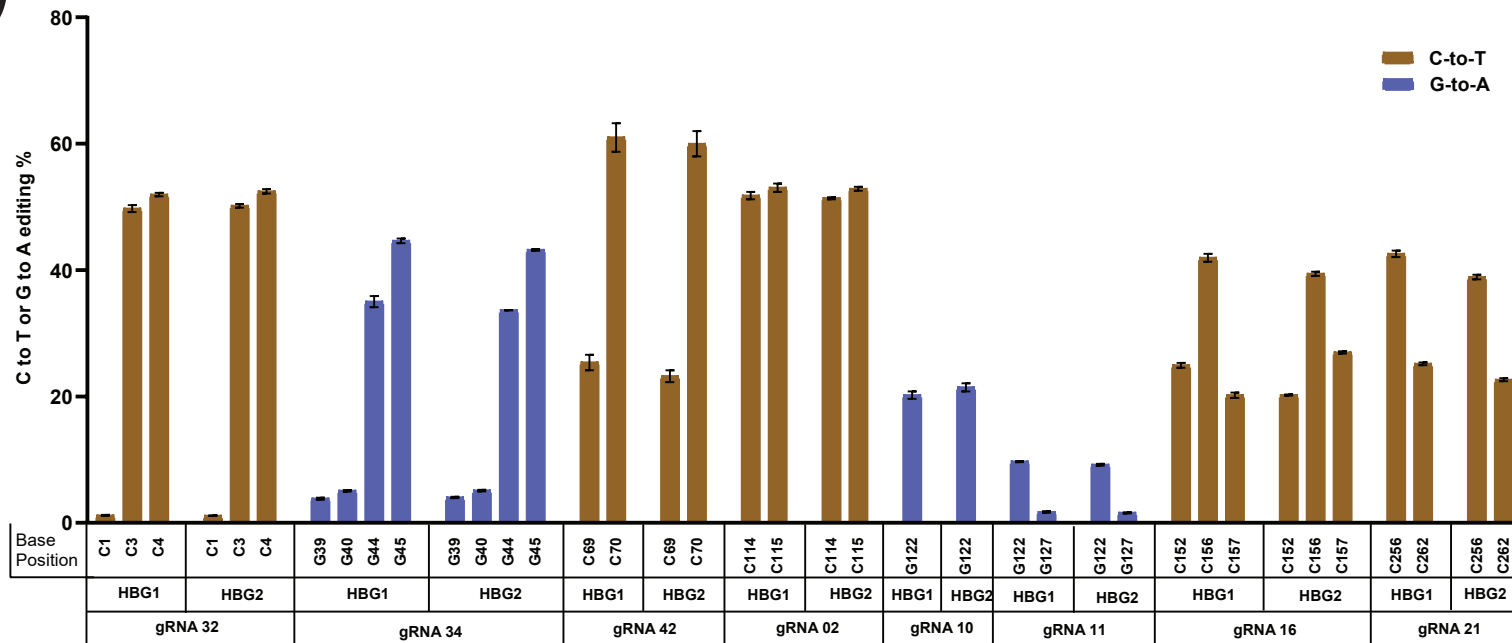

e)

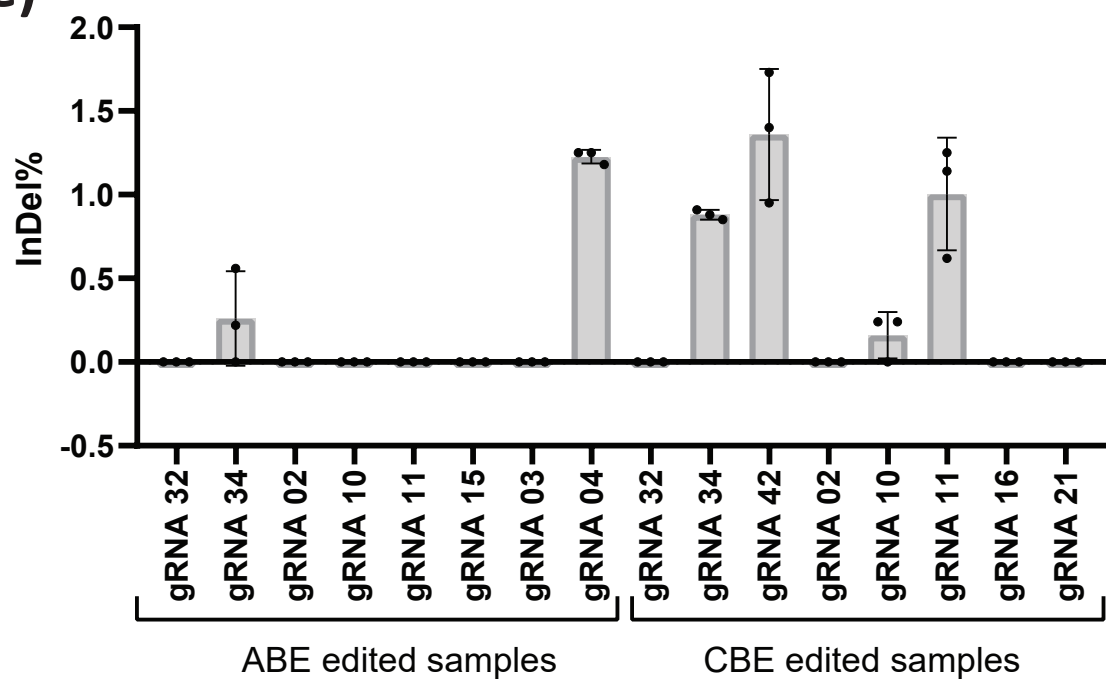

f)

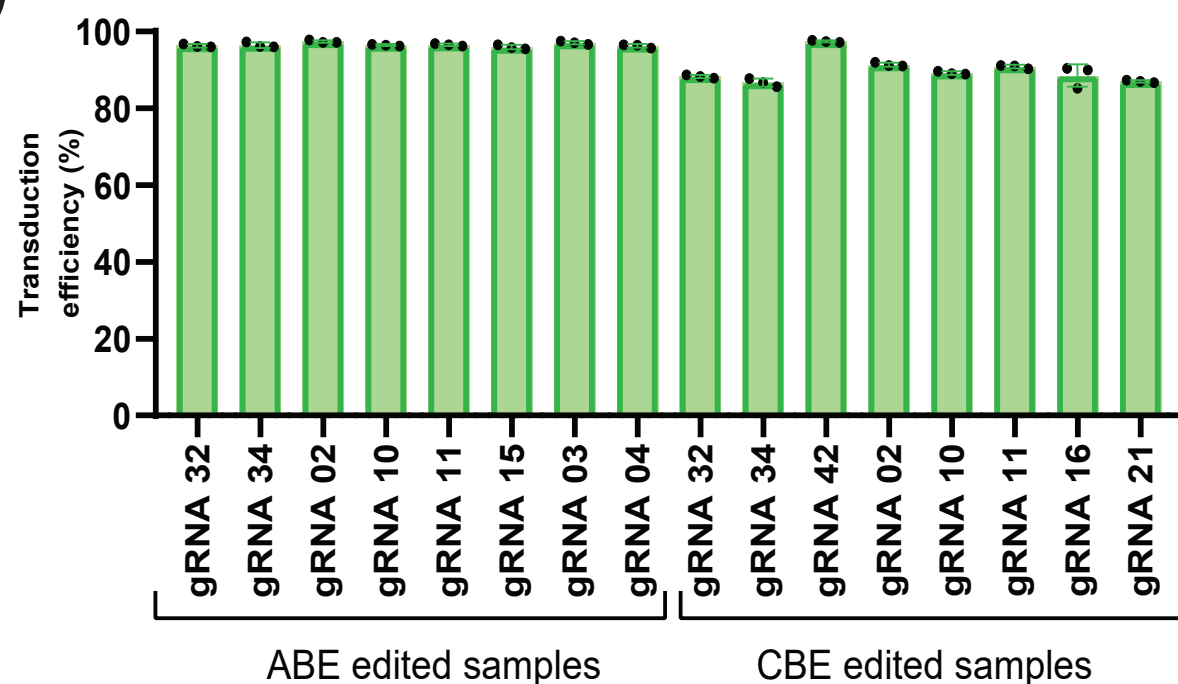

Supplement: supp [file elife-65421-supp-v1.zip]

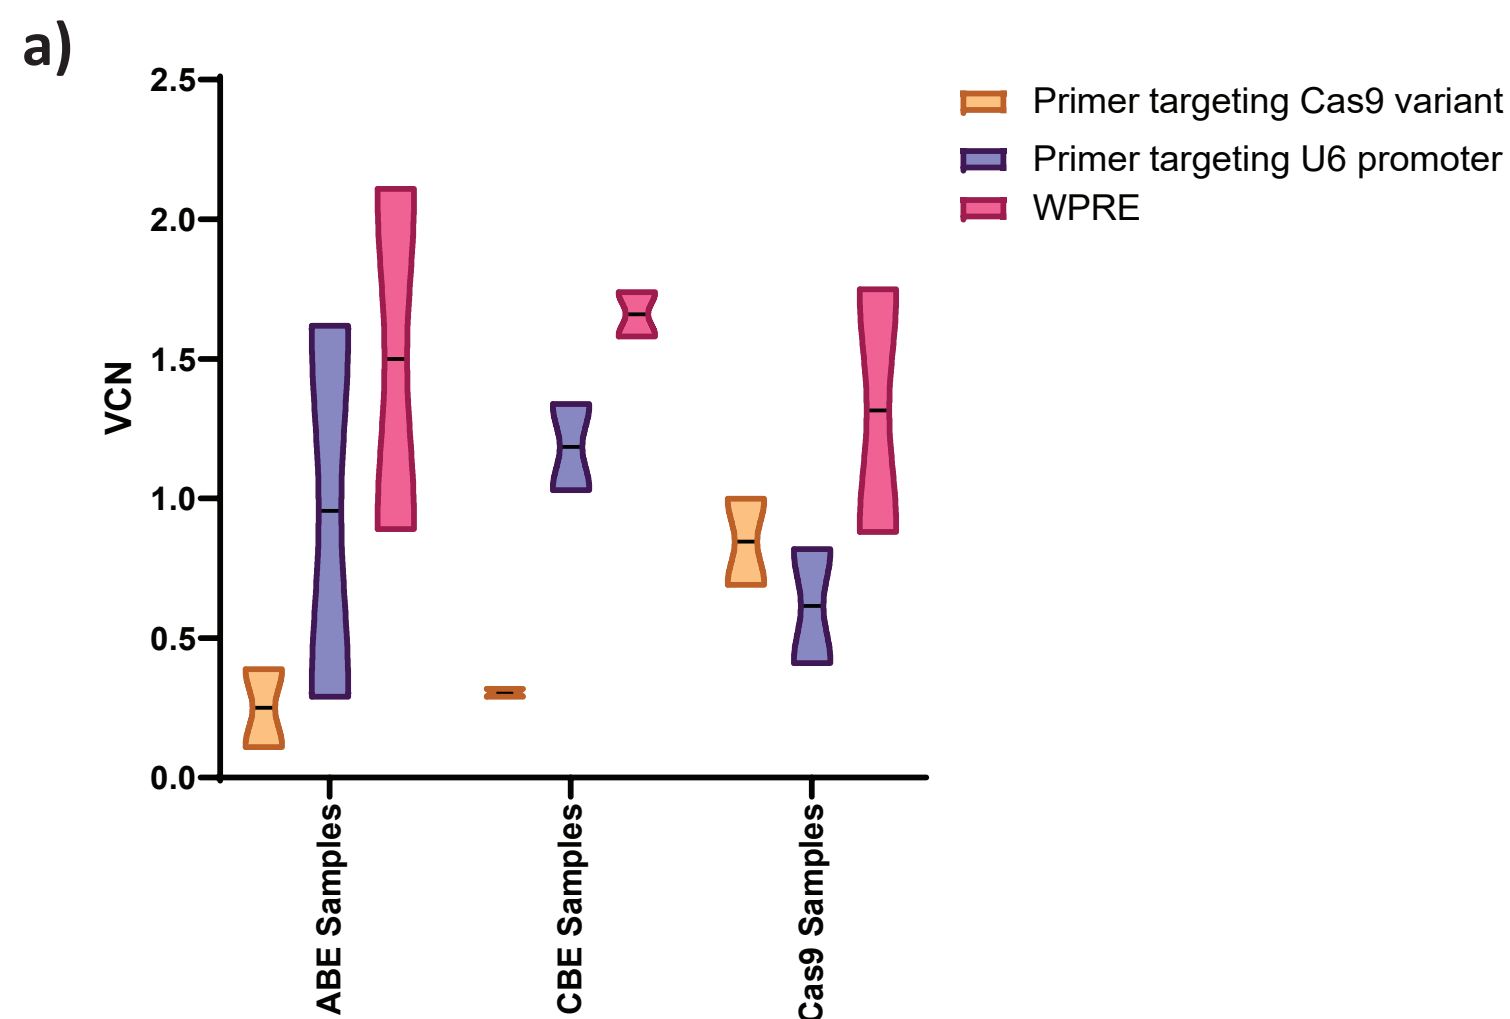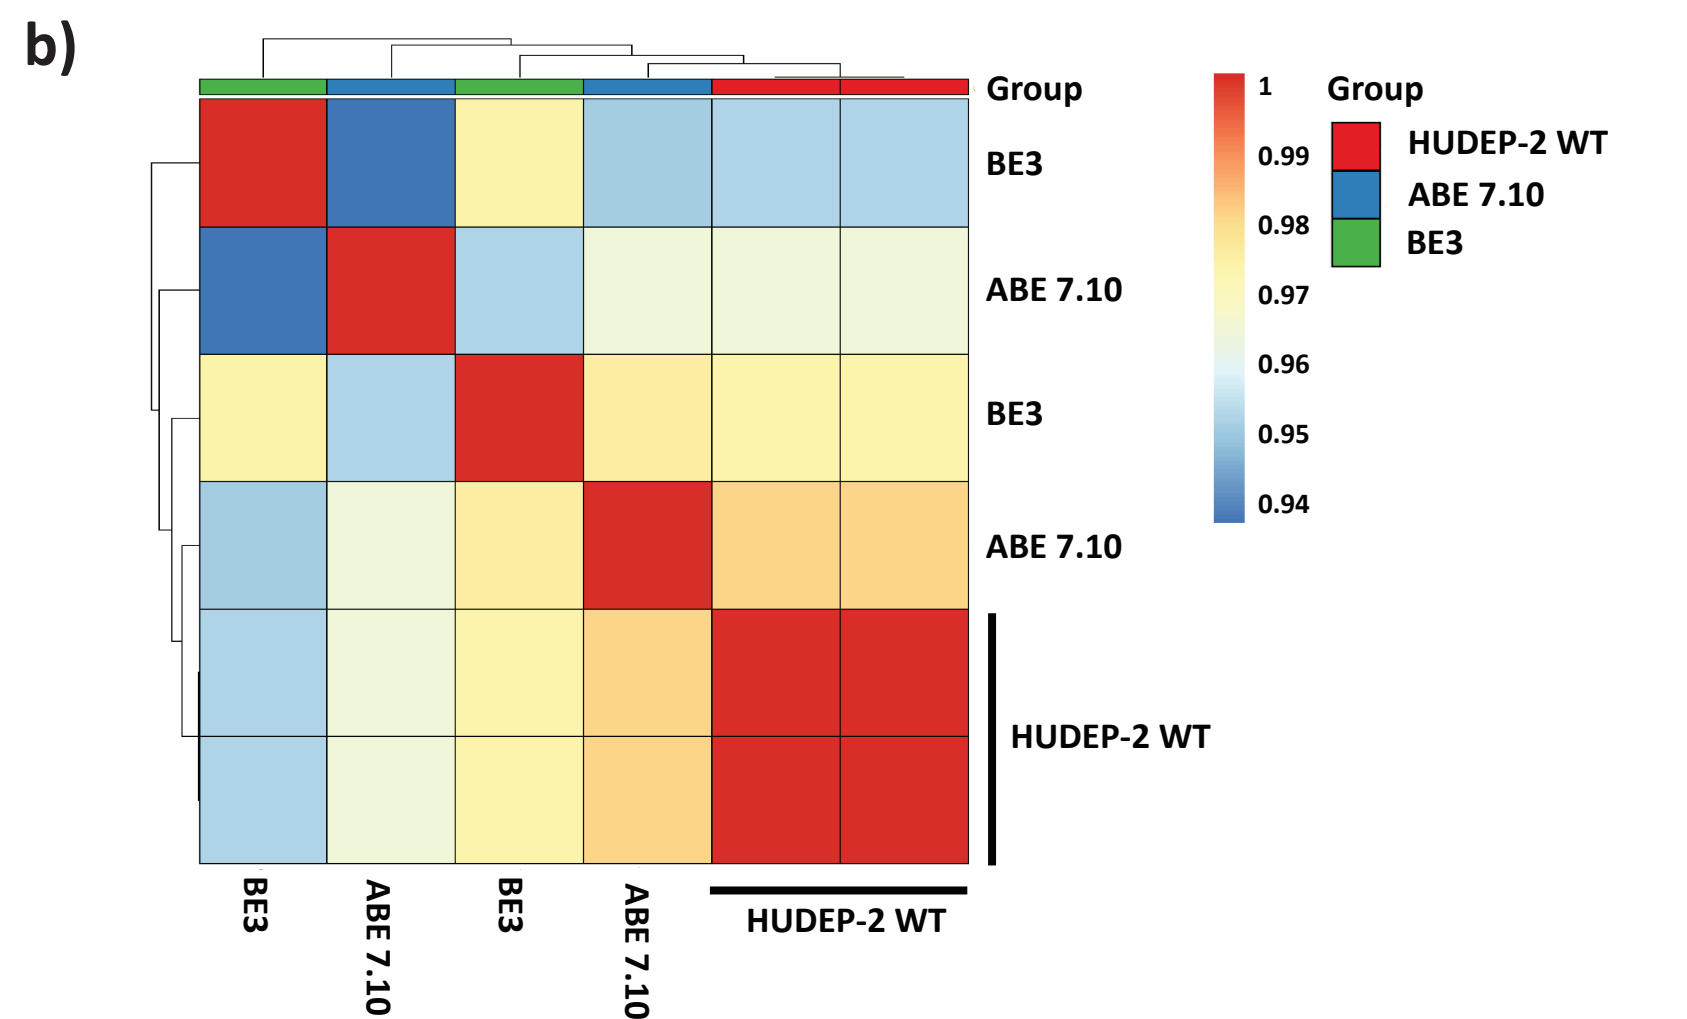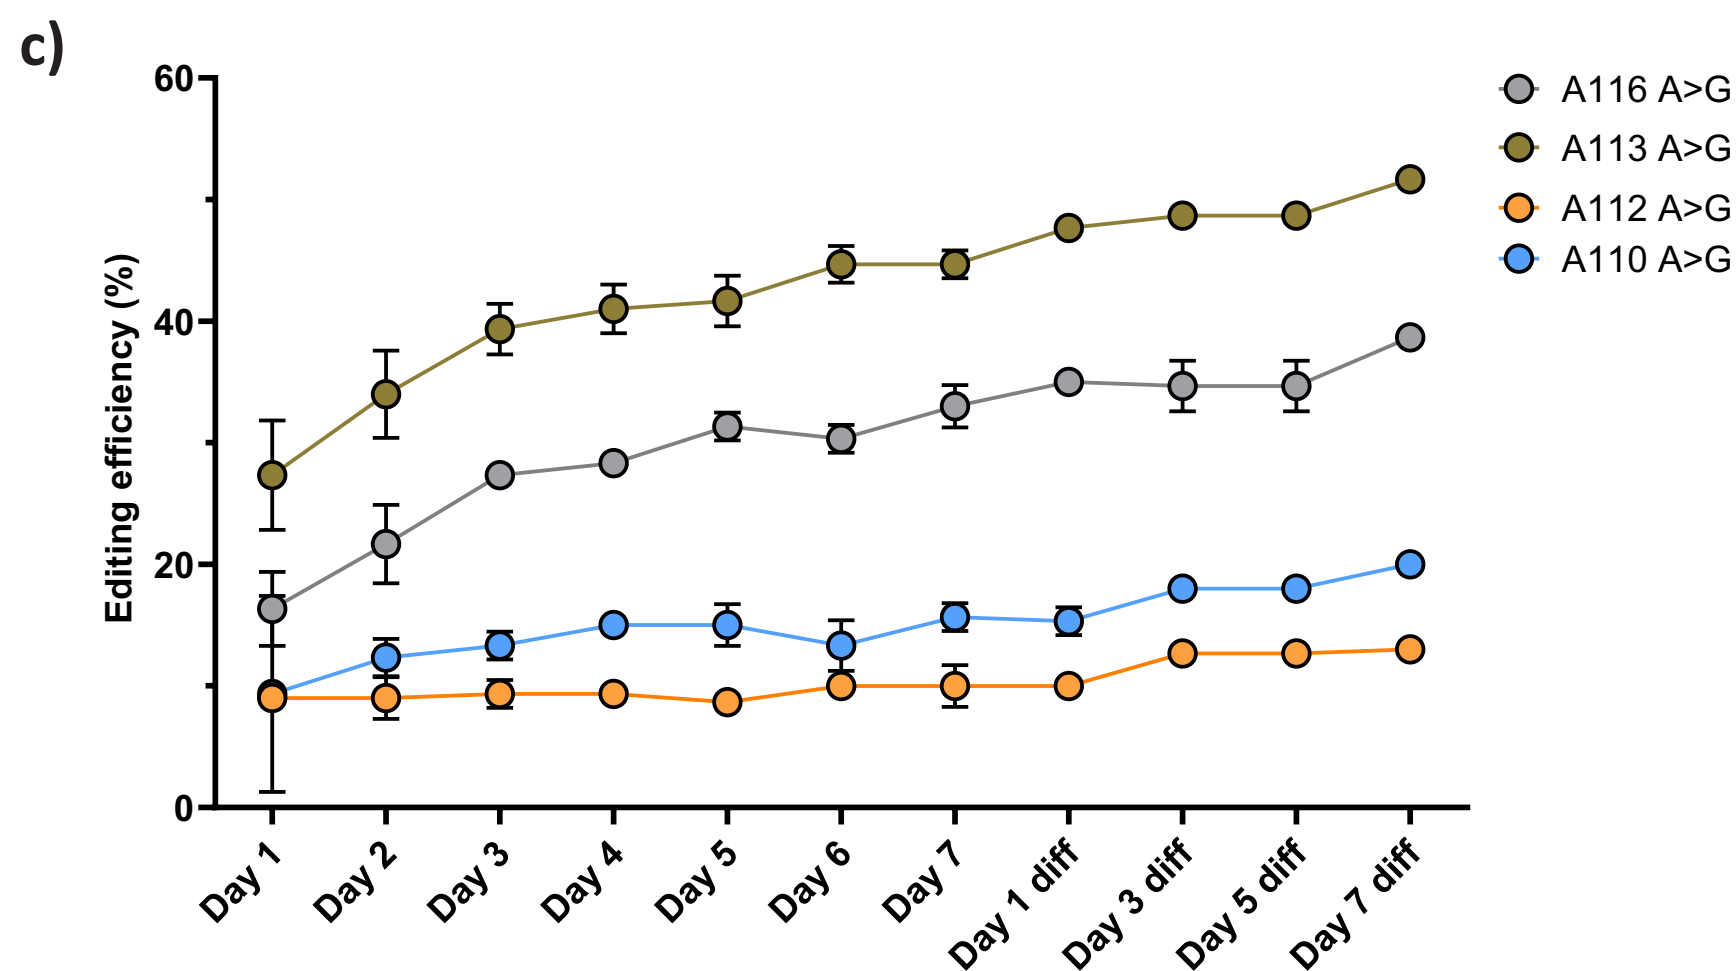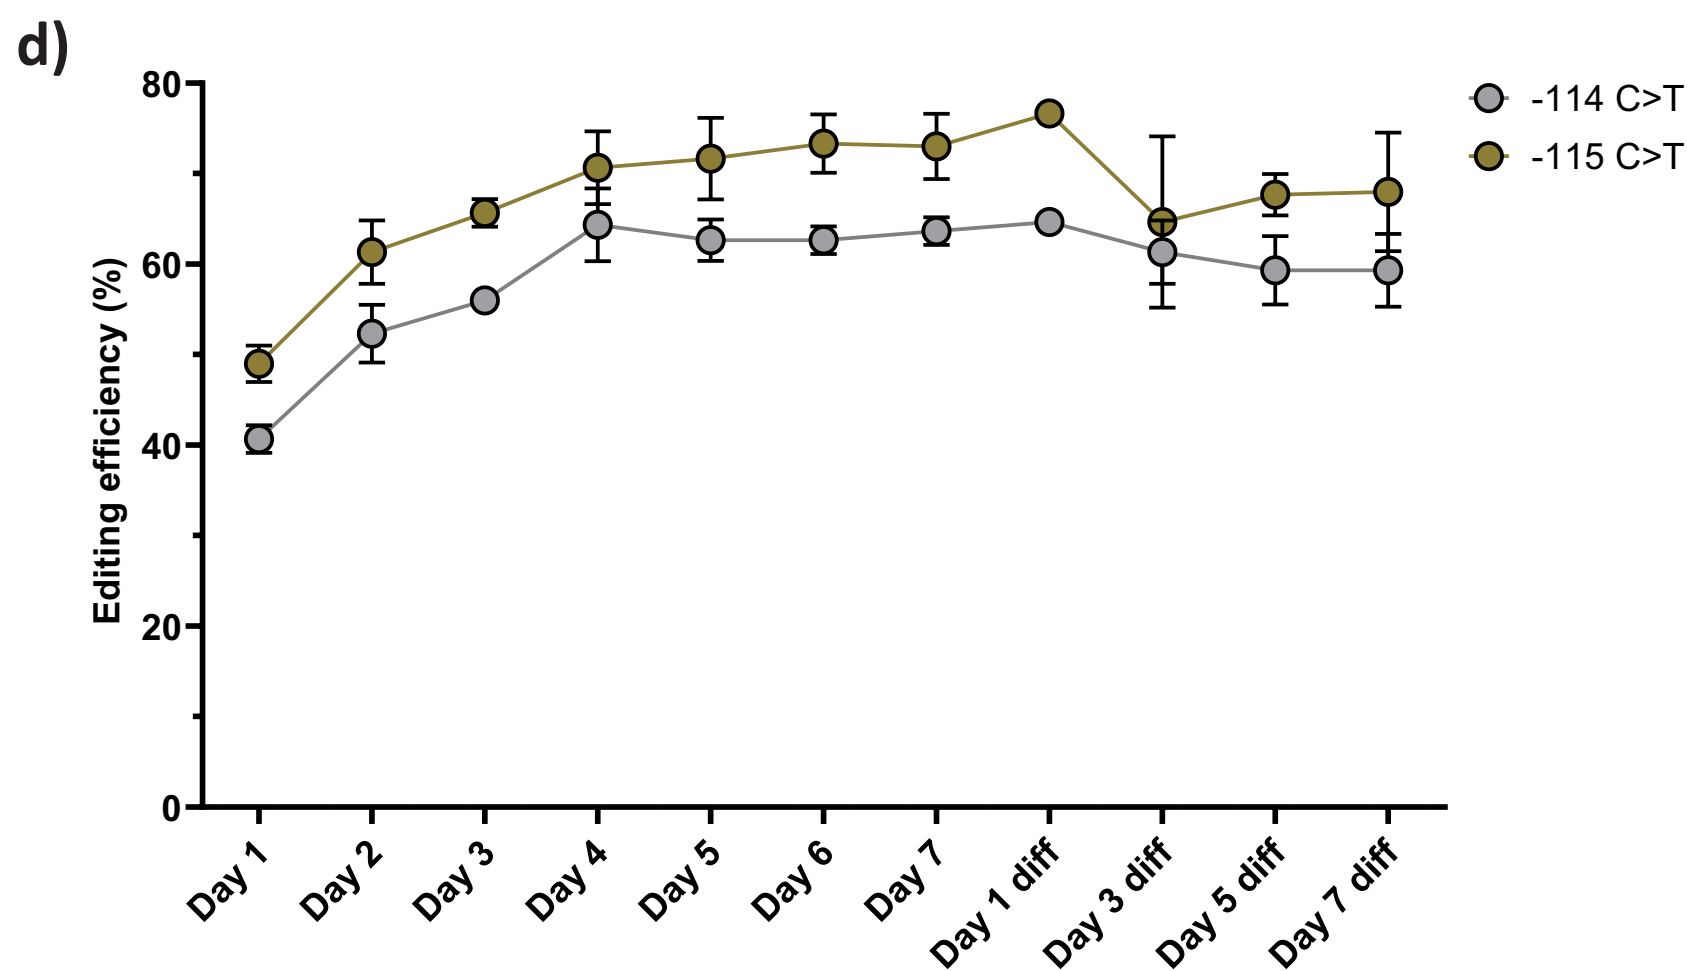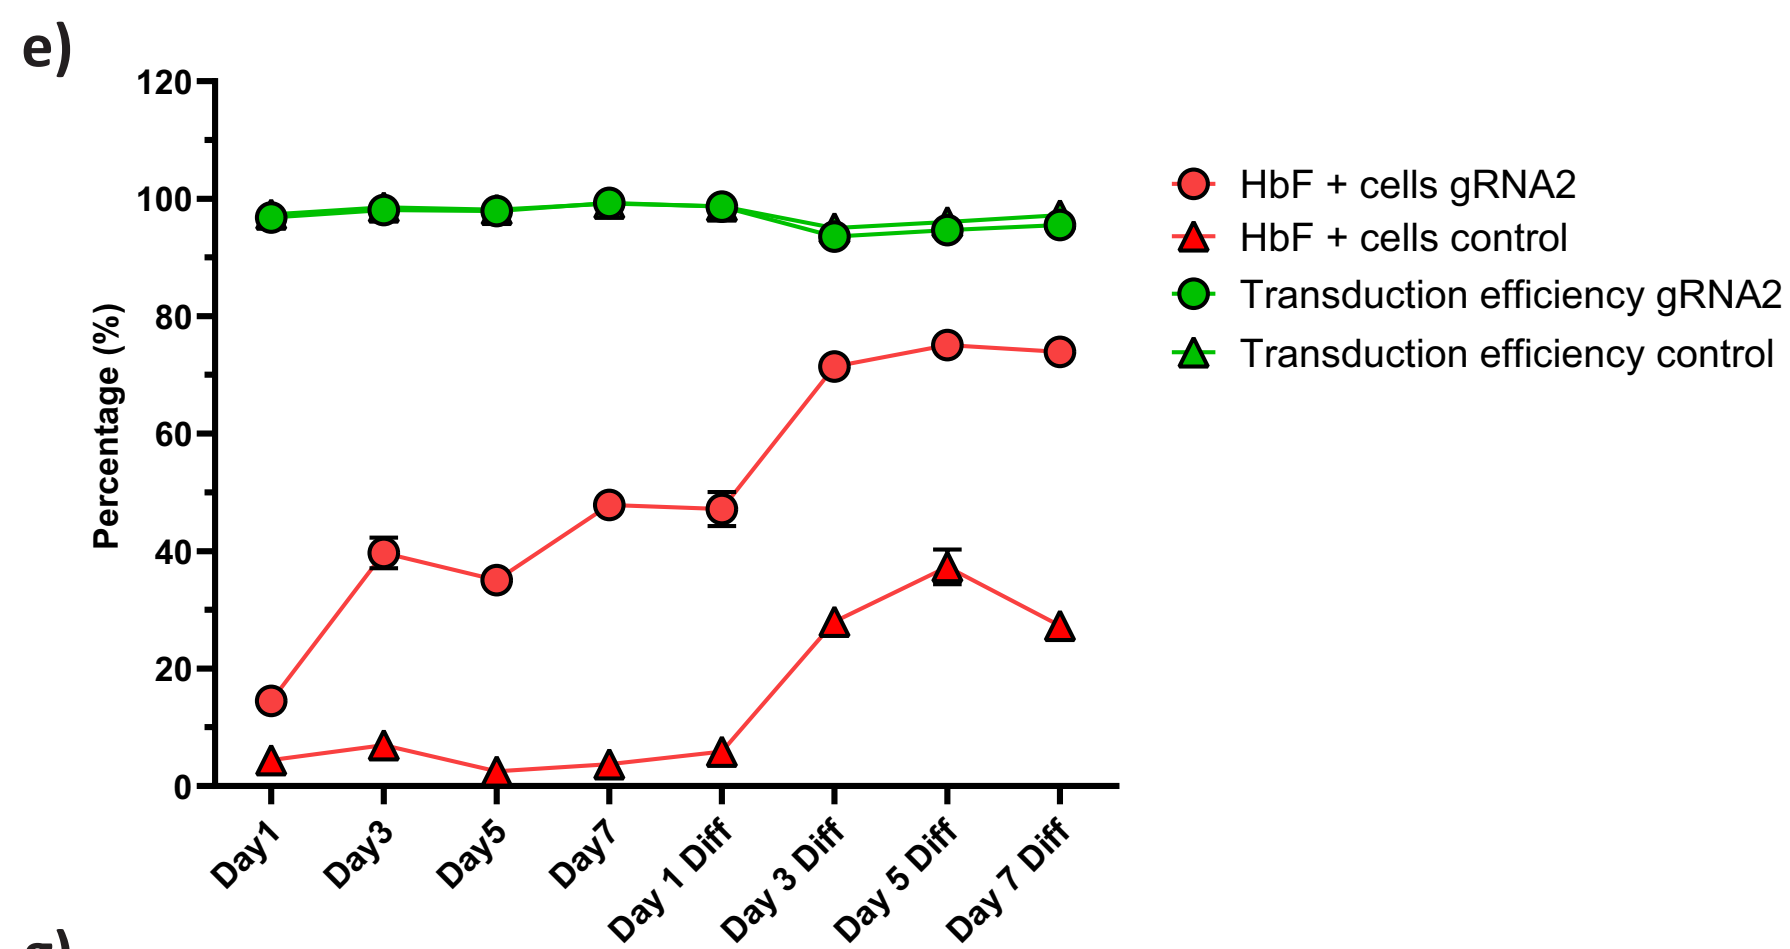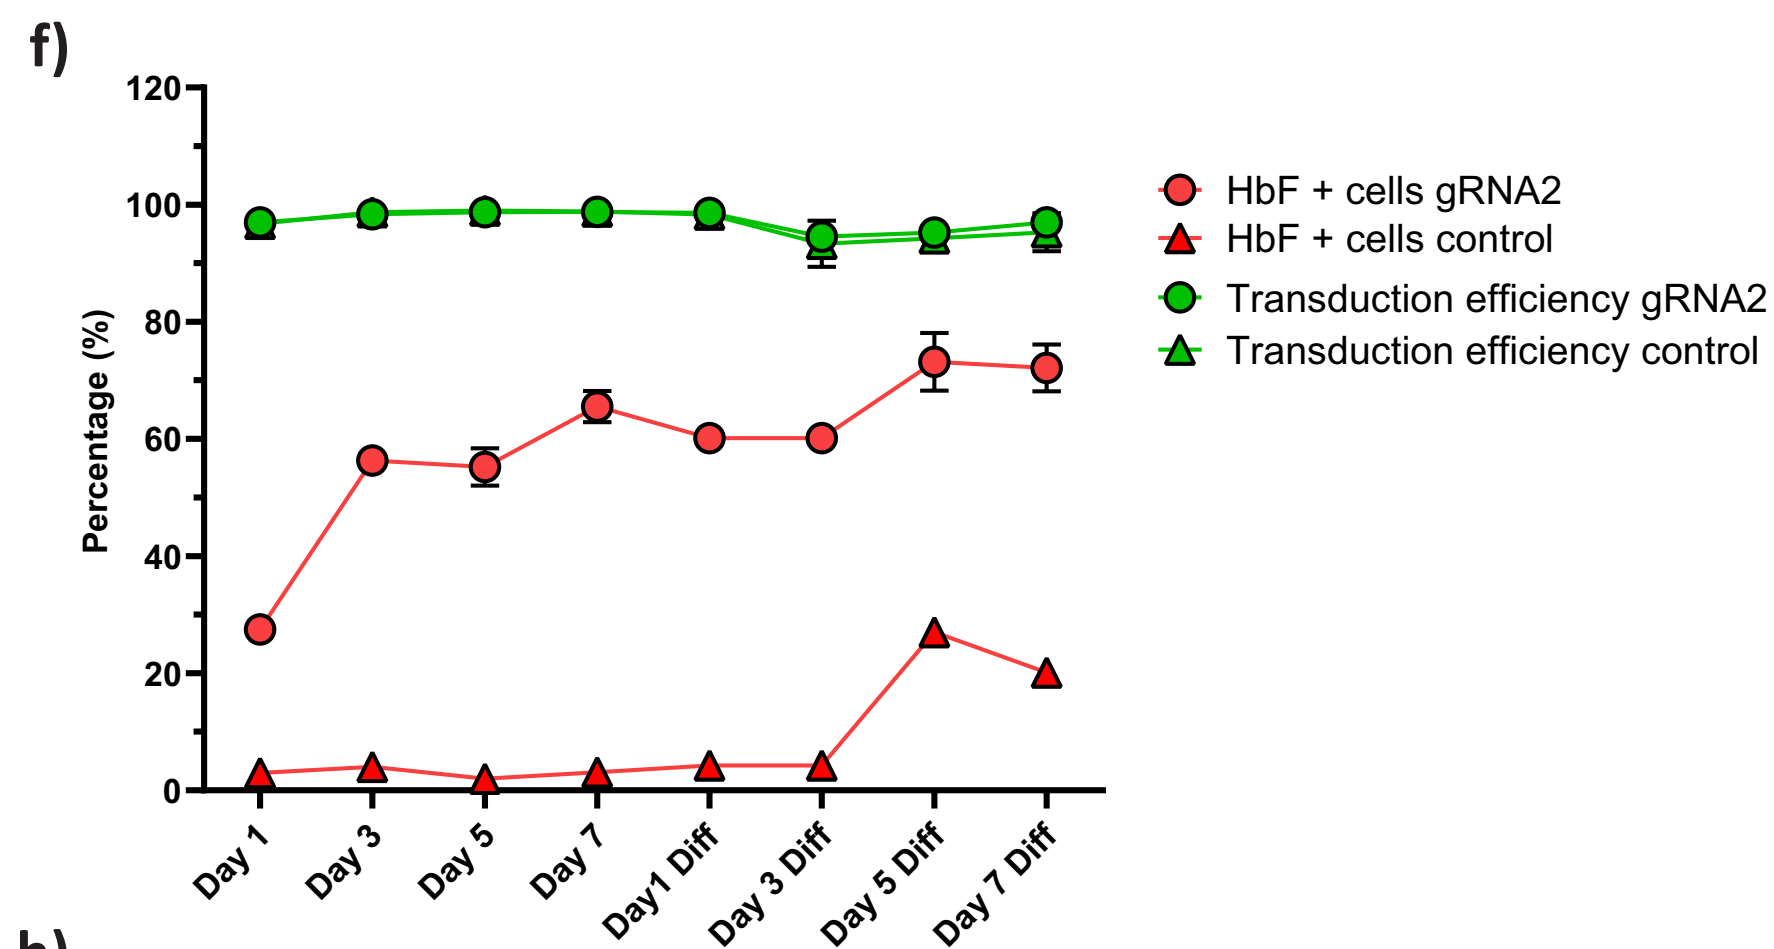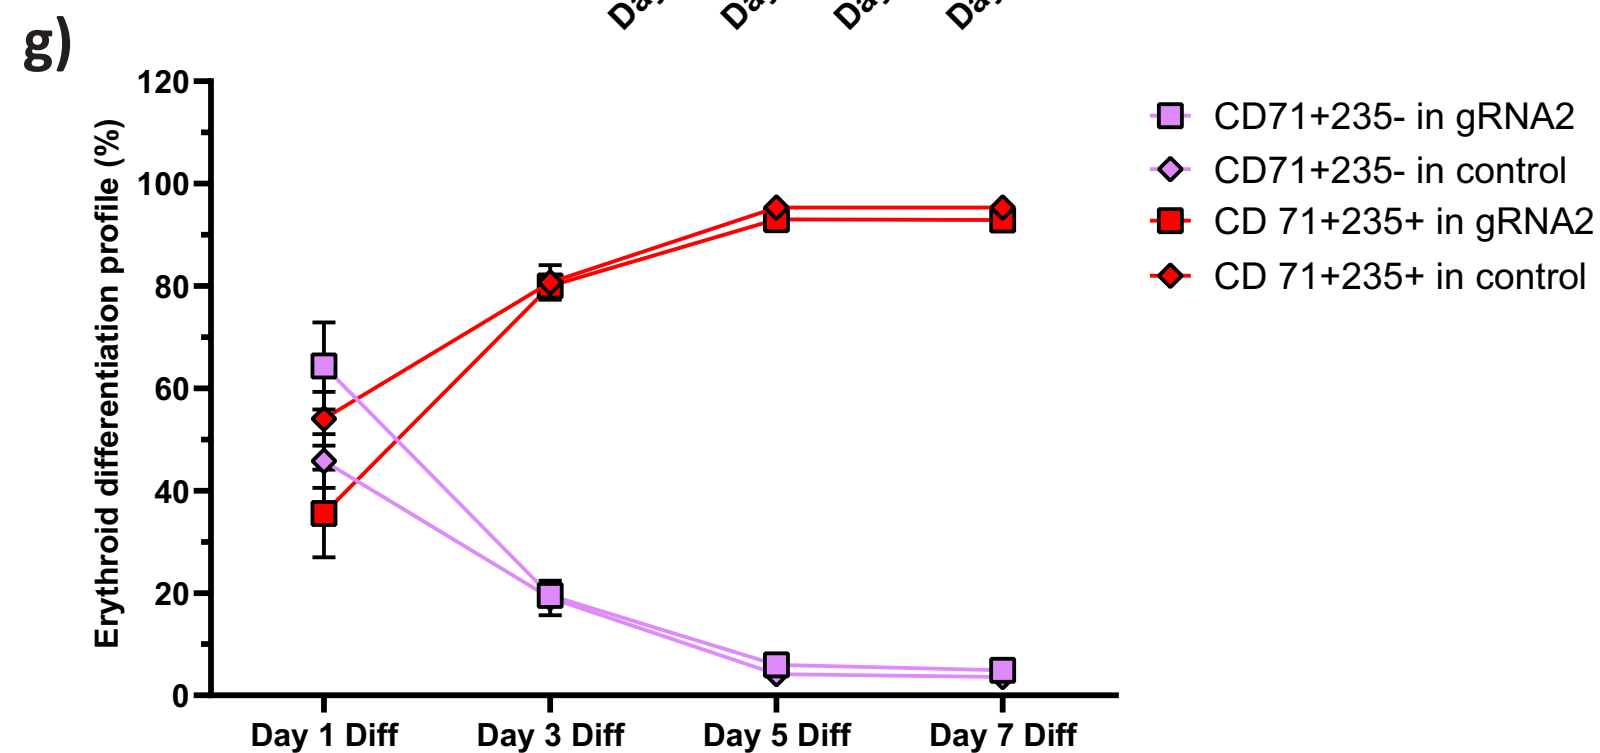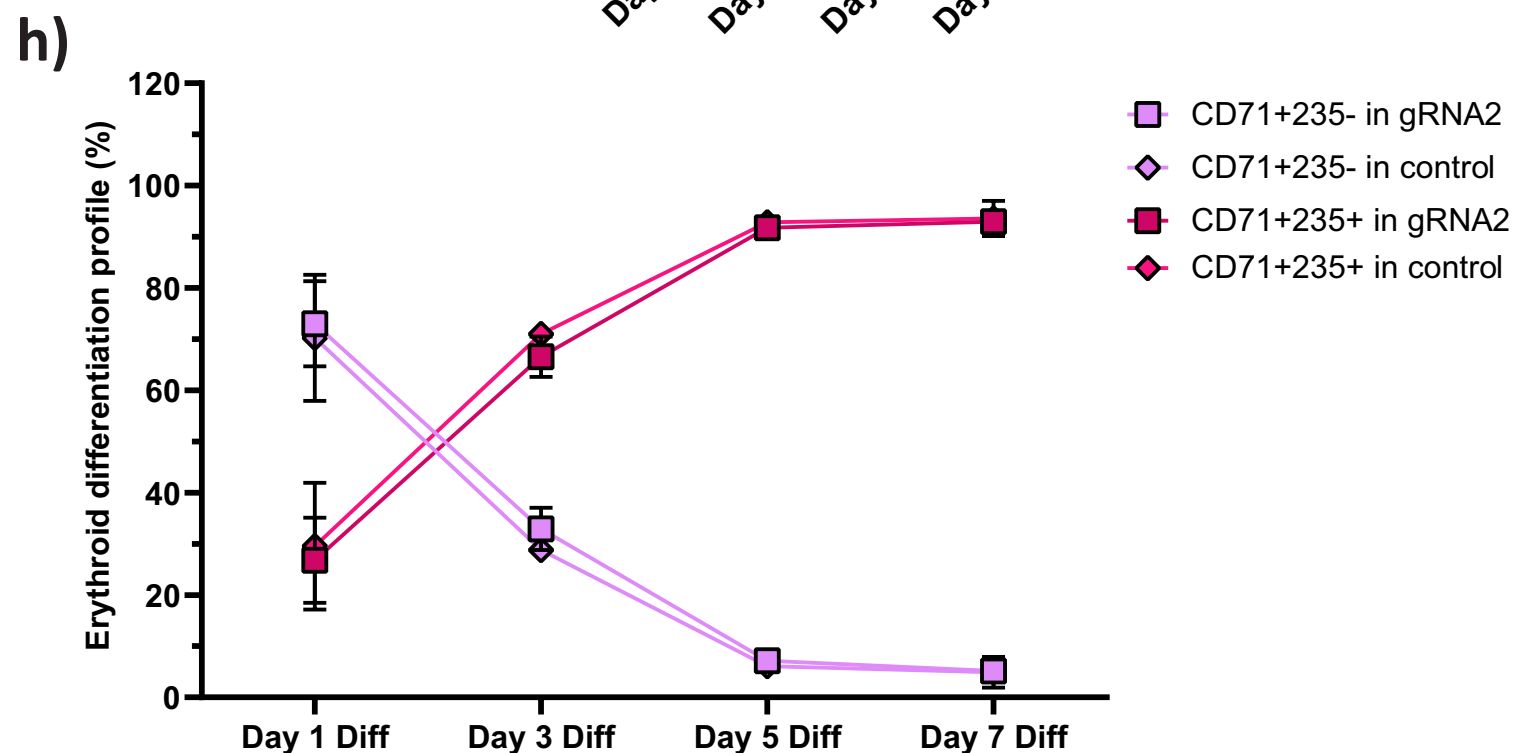

Supplement: supp [file elife-65421-supp-v1.zip]

a)

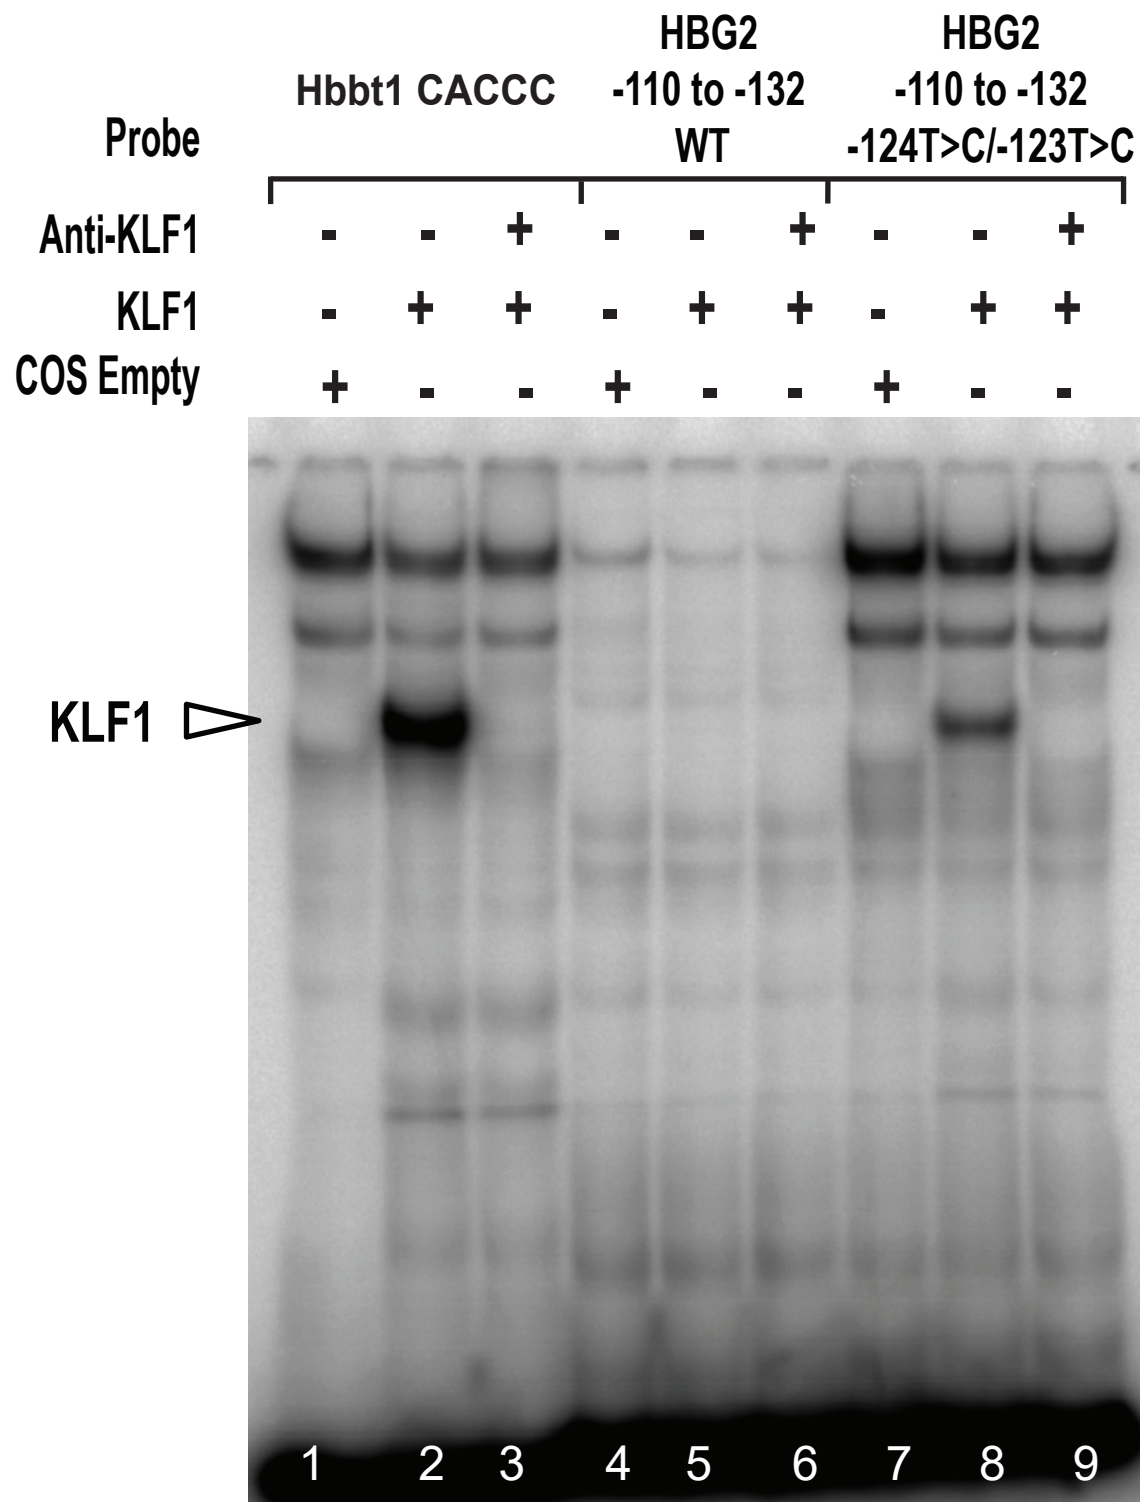

b)

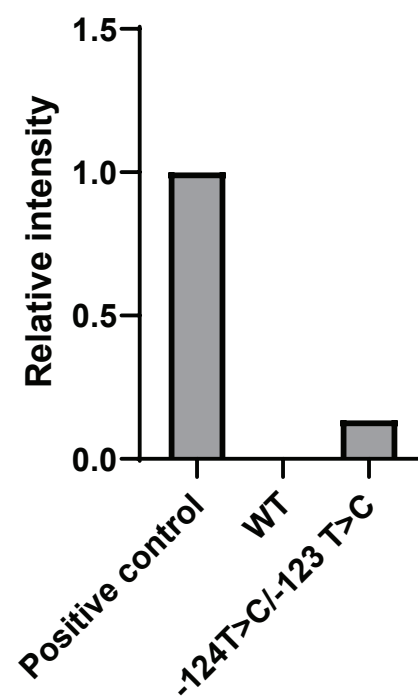

c)

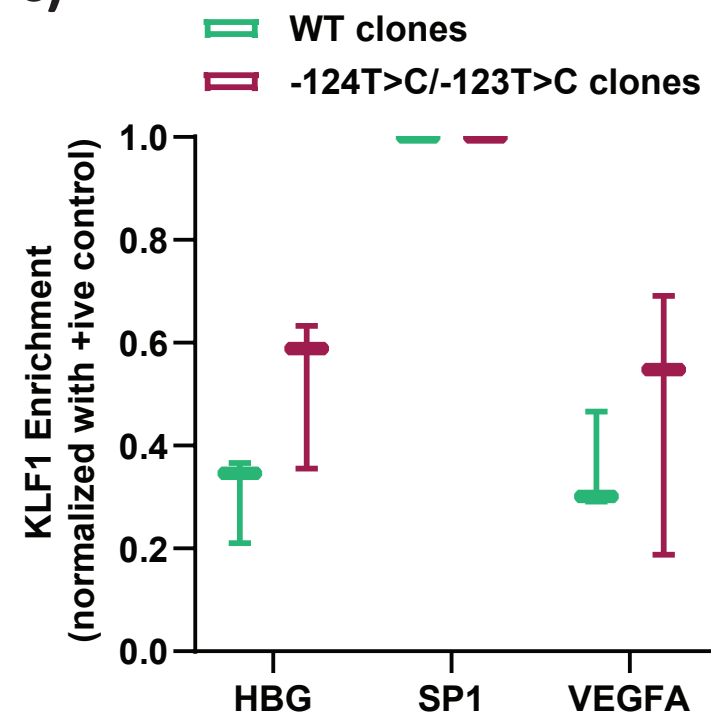

Supplement: supp [file elife-65421-supp-v1.zip]

a)

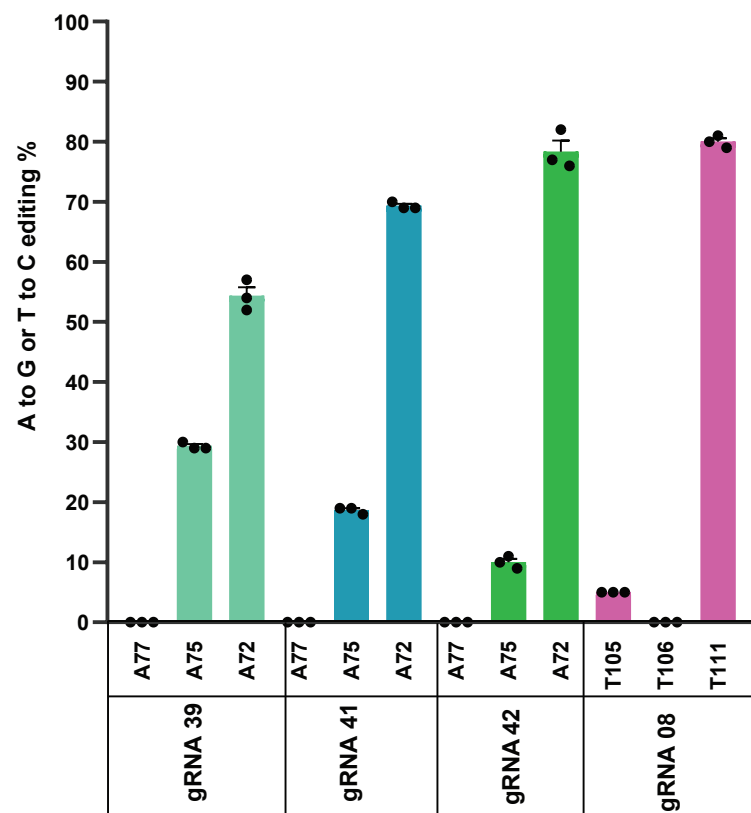

b)

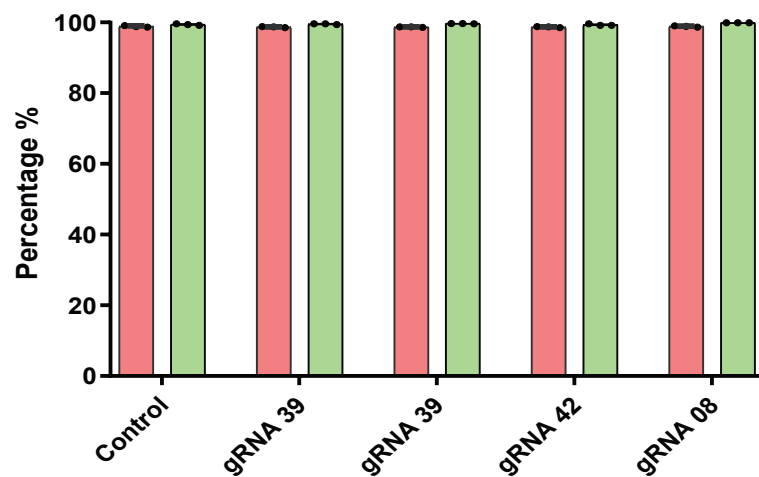

c)

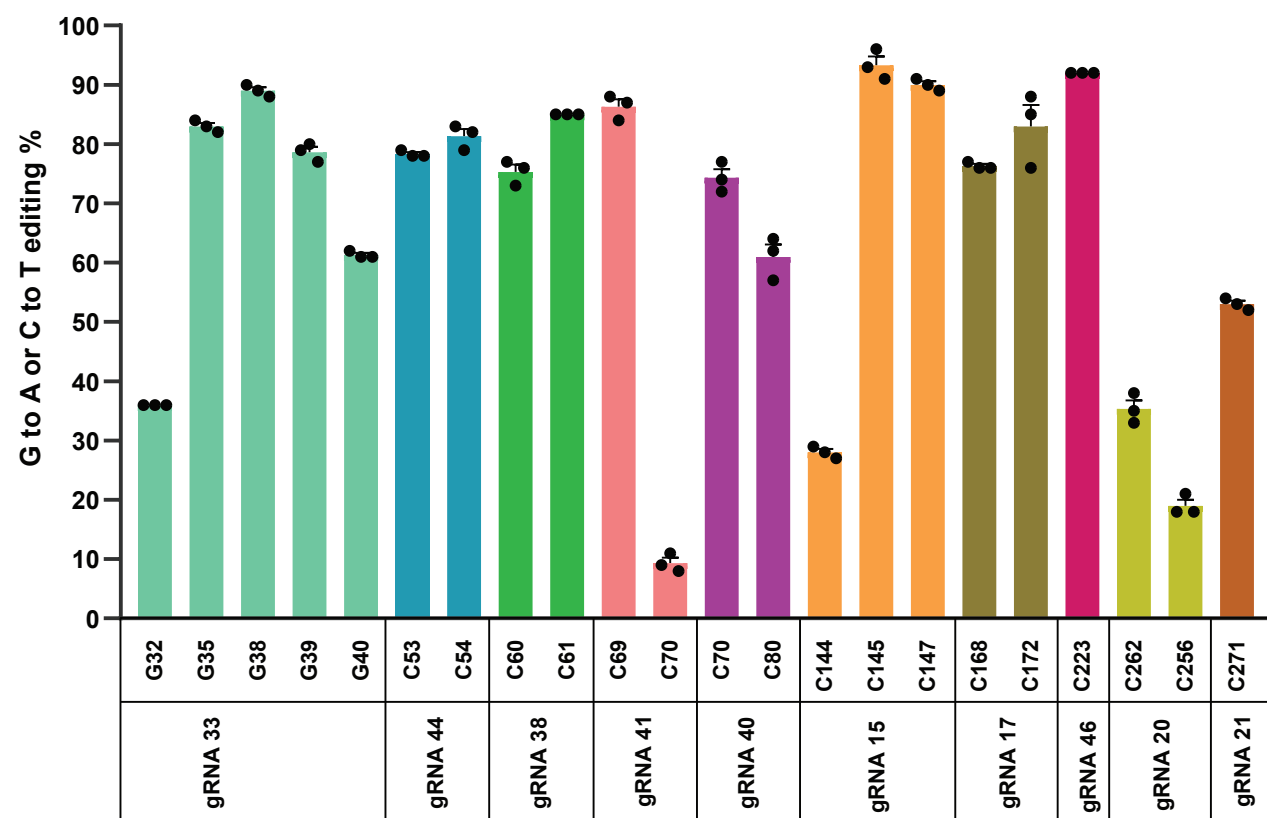

d)

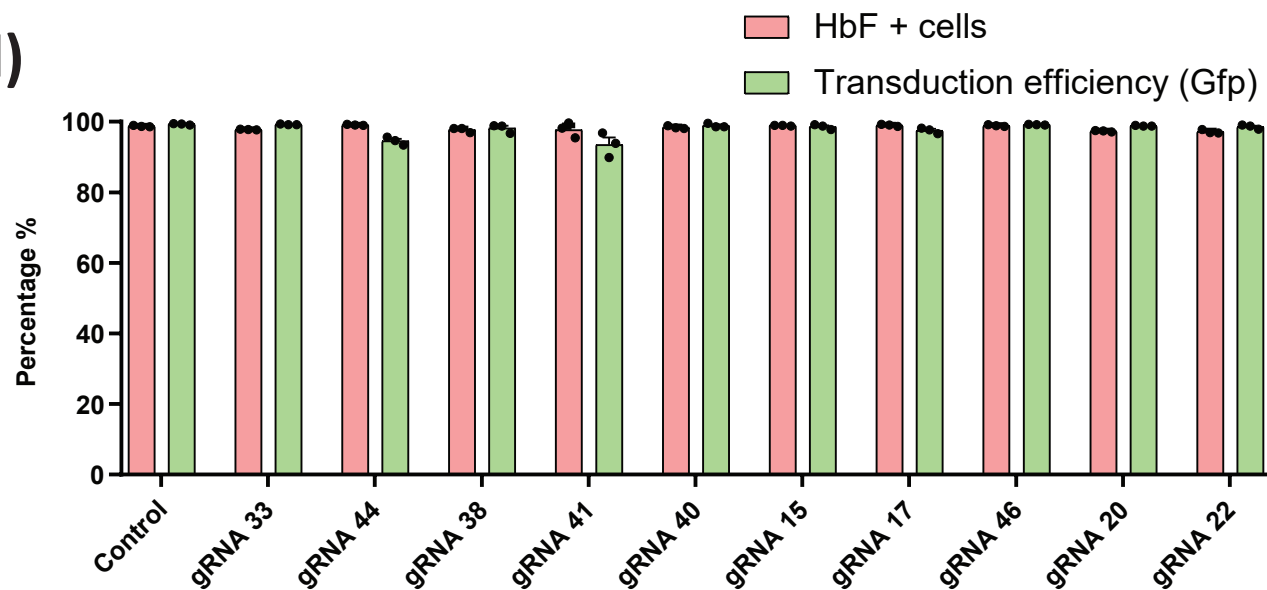

Supplement: supp [file elife-65421-supp-v1.zip]

a)

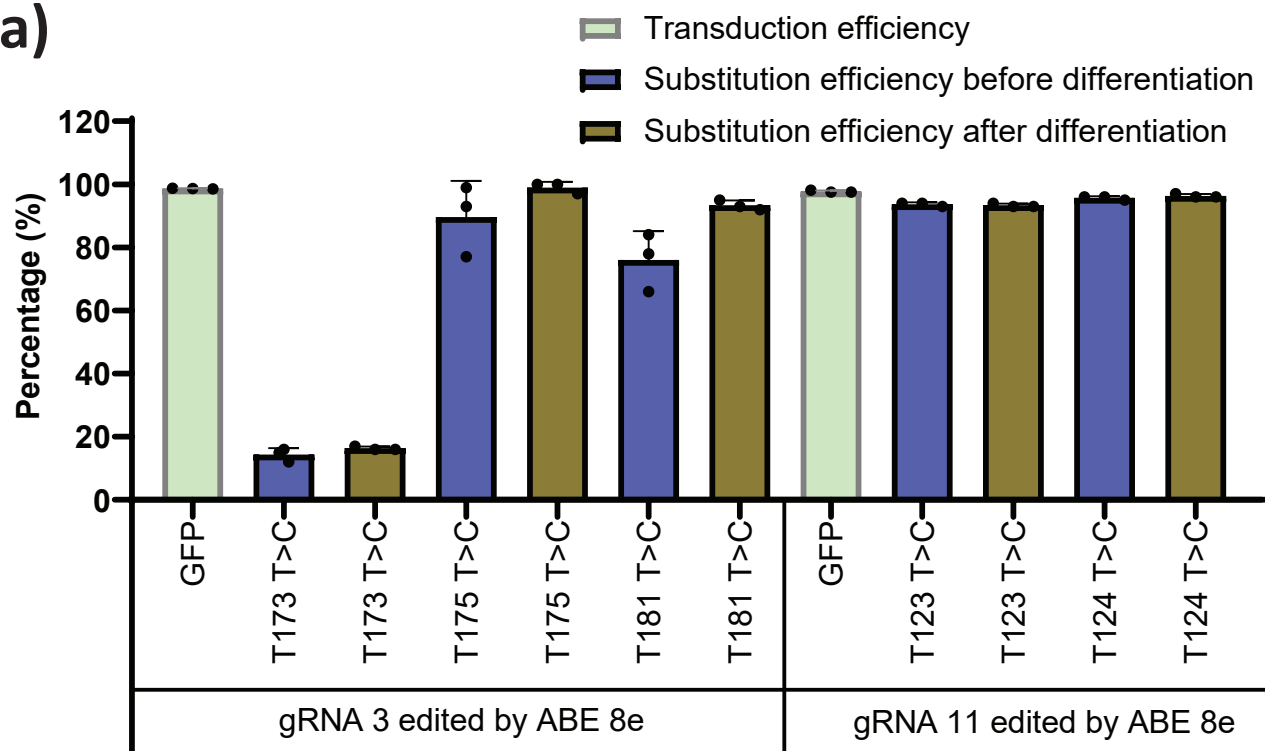

b)

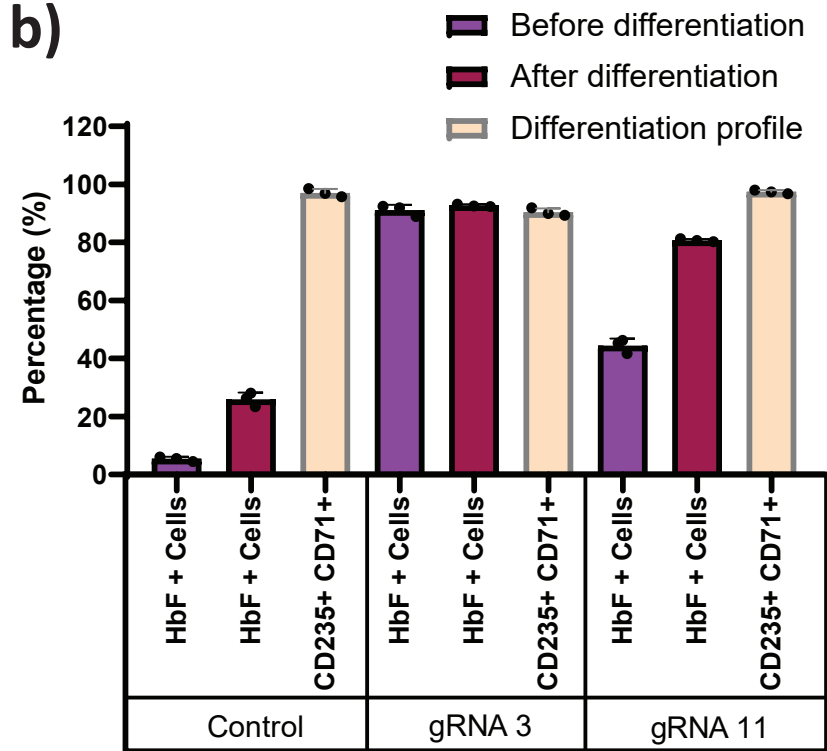

c)

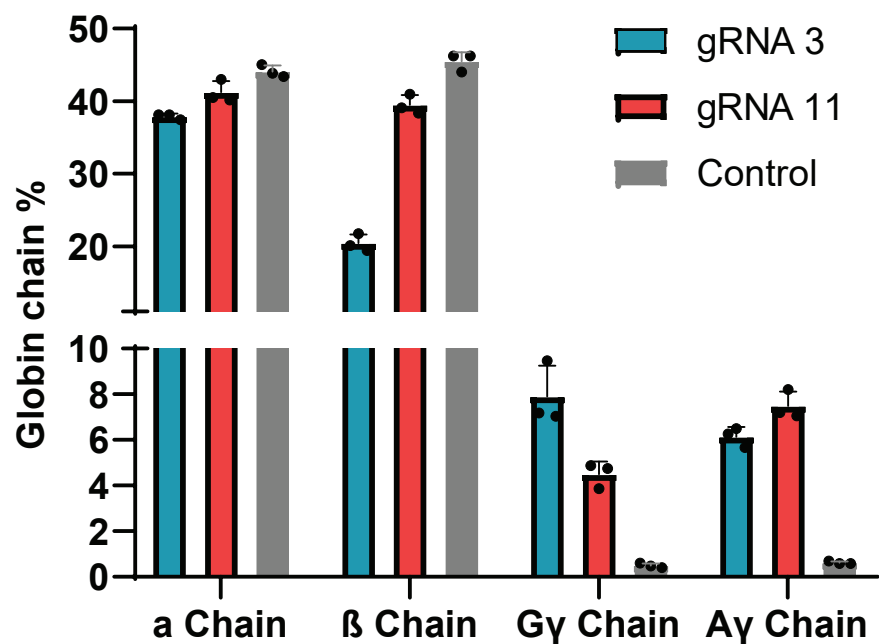

d)

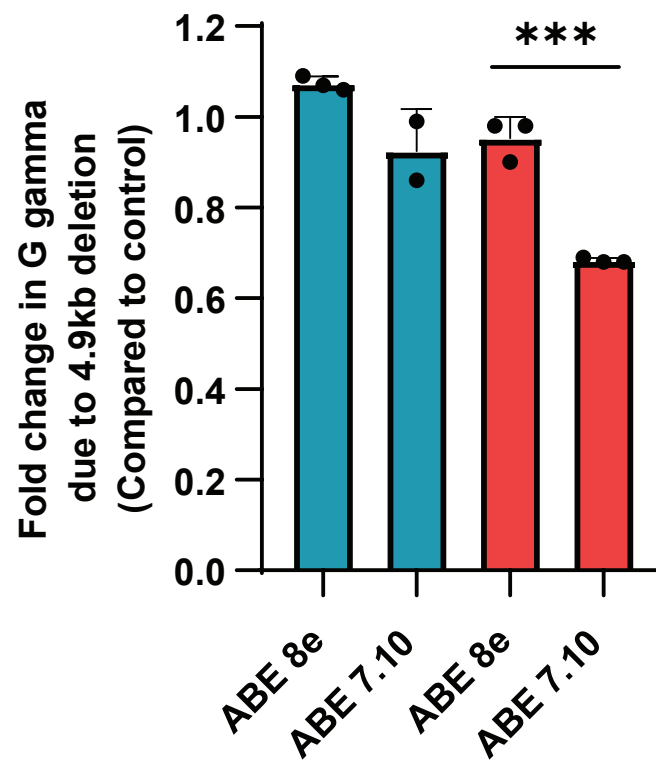

e)

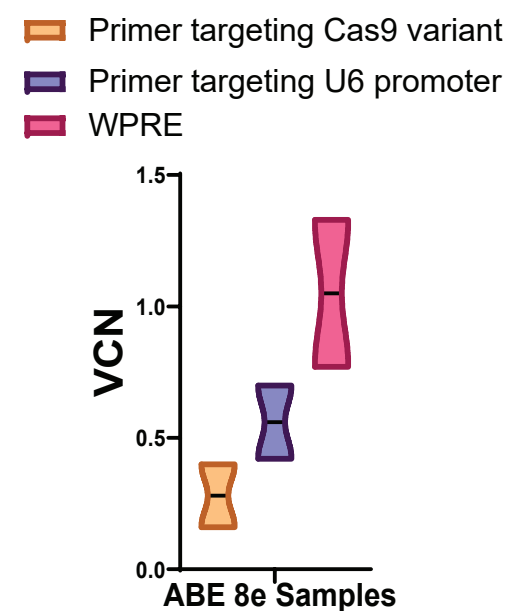

Supplement: supp [file elife-65421-supp-v1.zip]

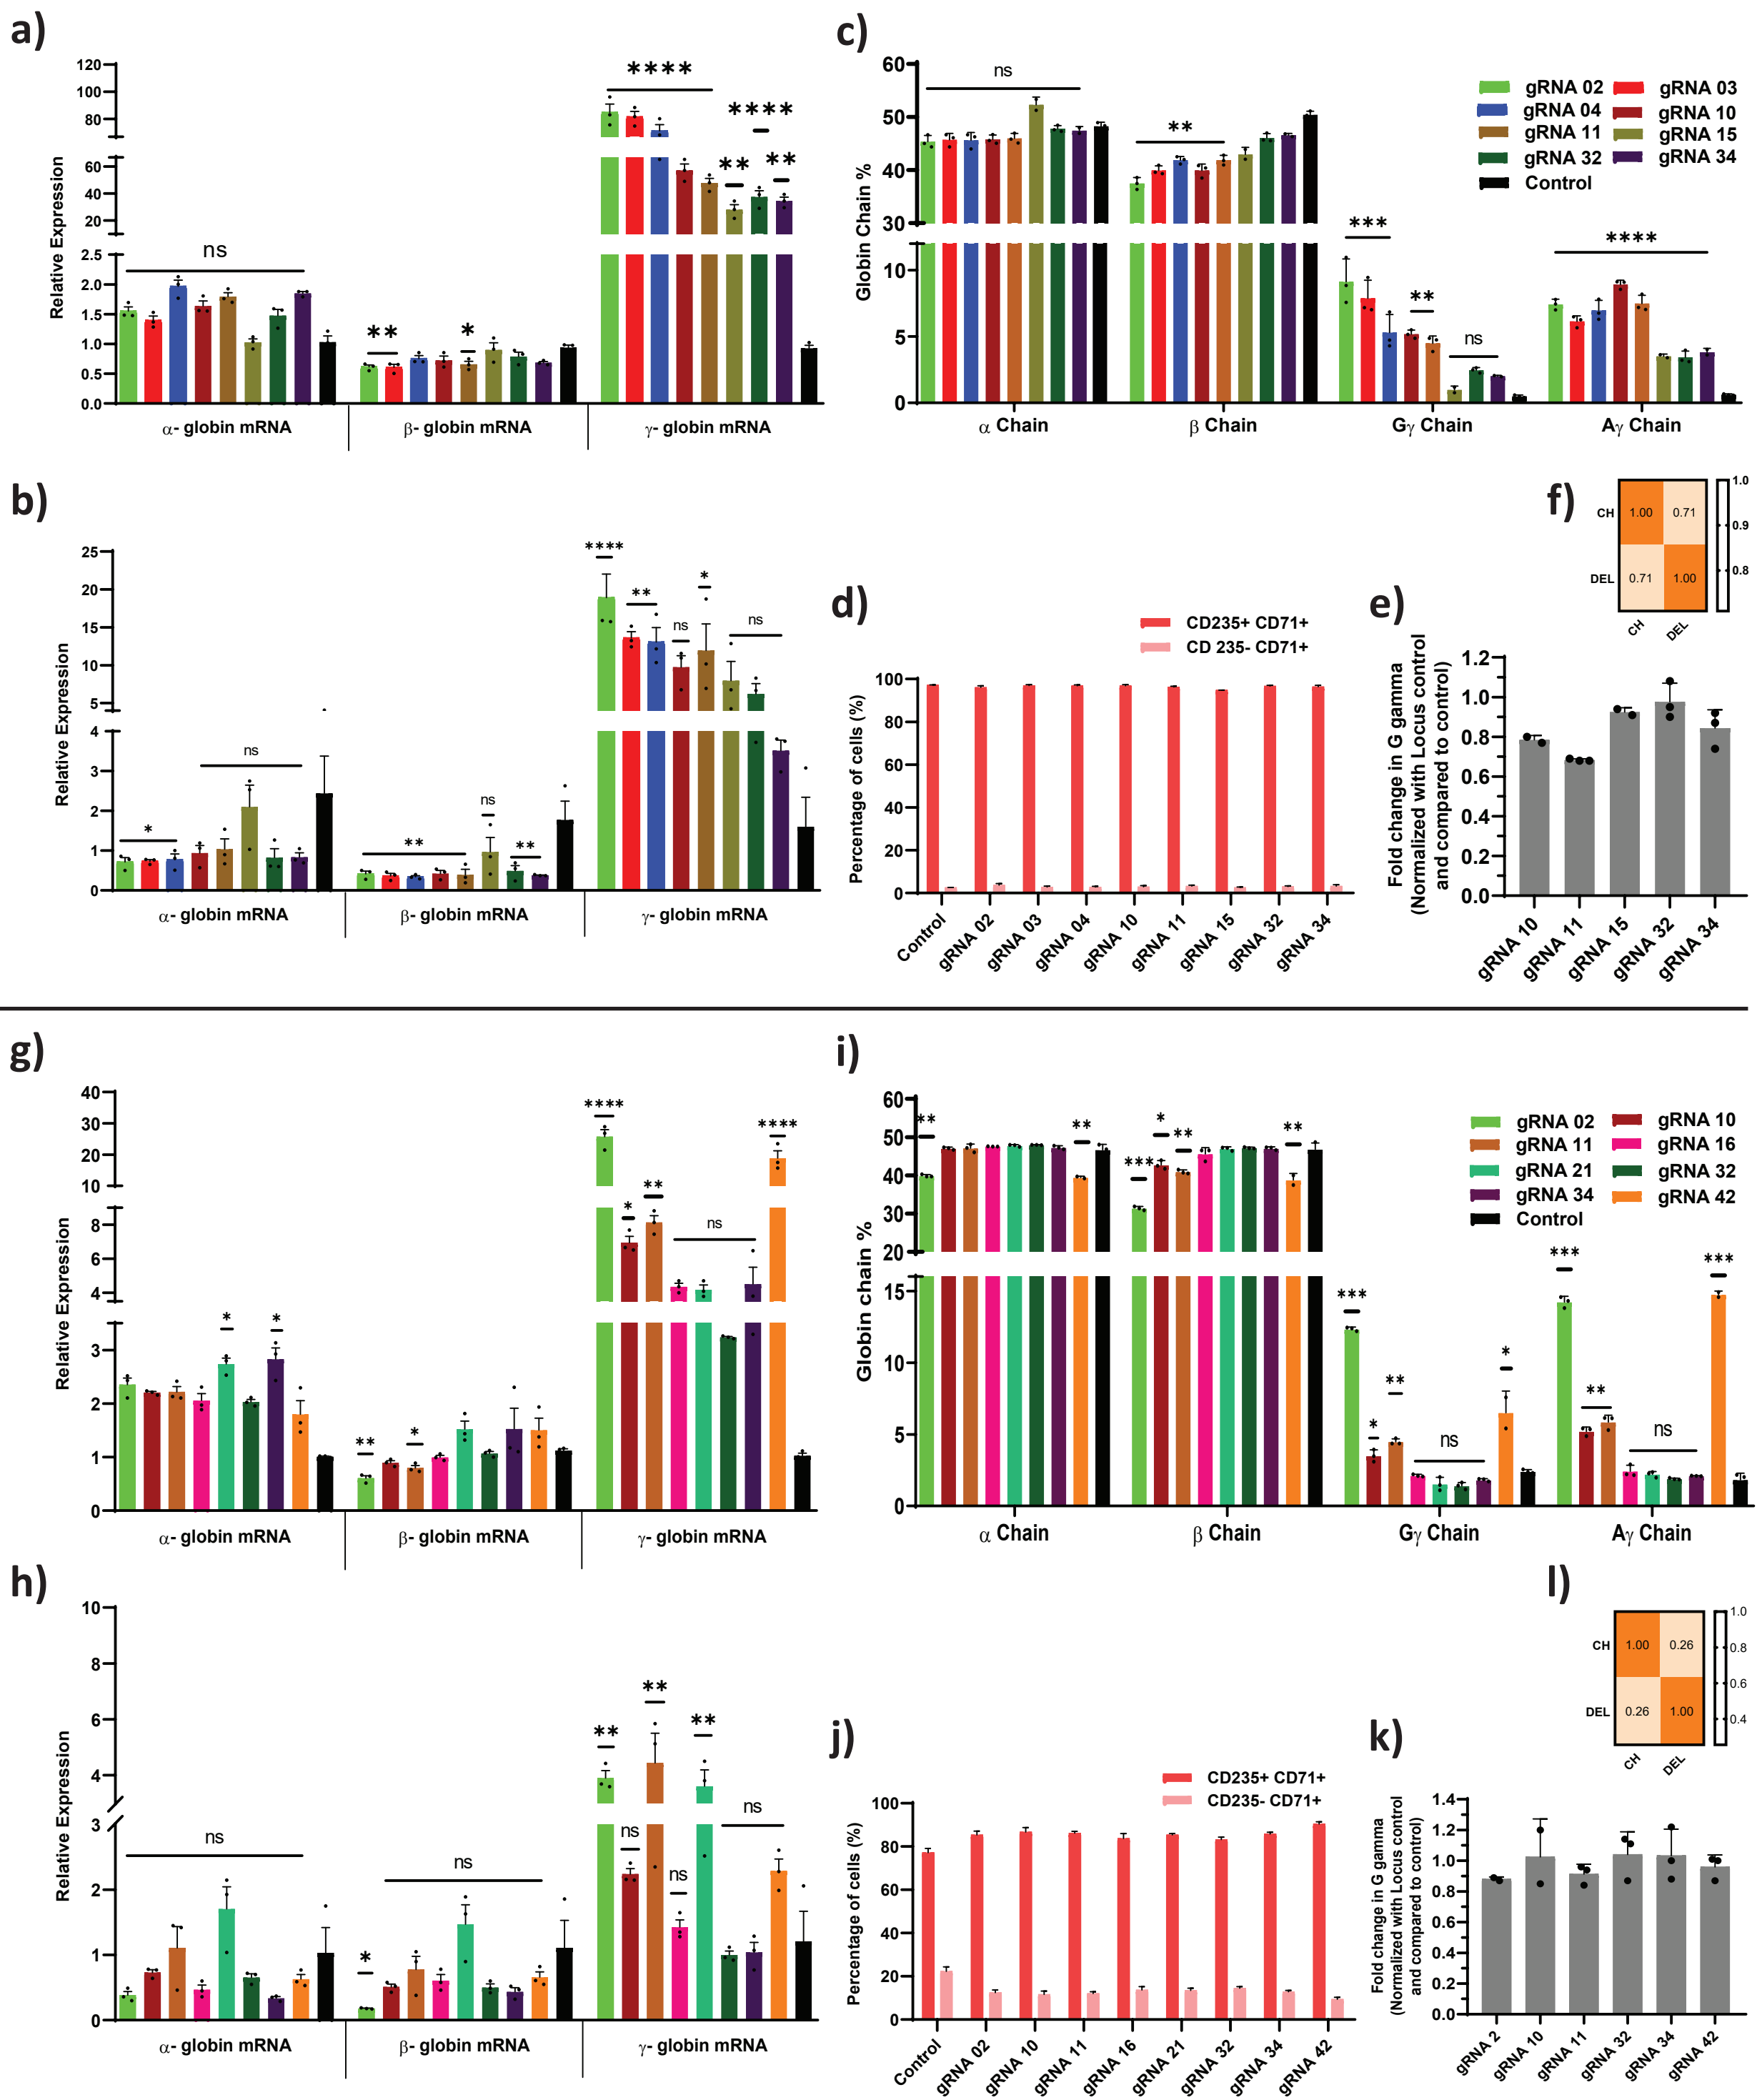

Supplement: supp [file elife-65421-supp-v1.zip]

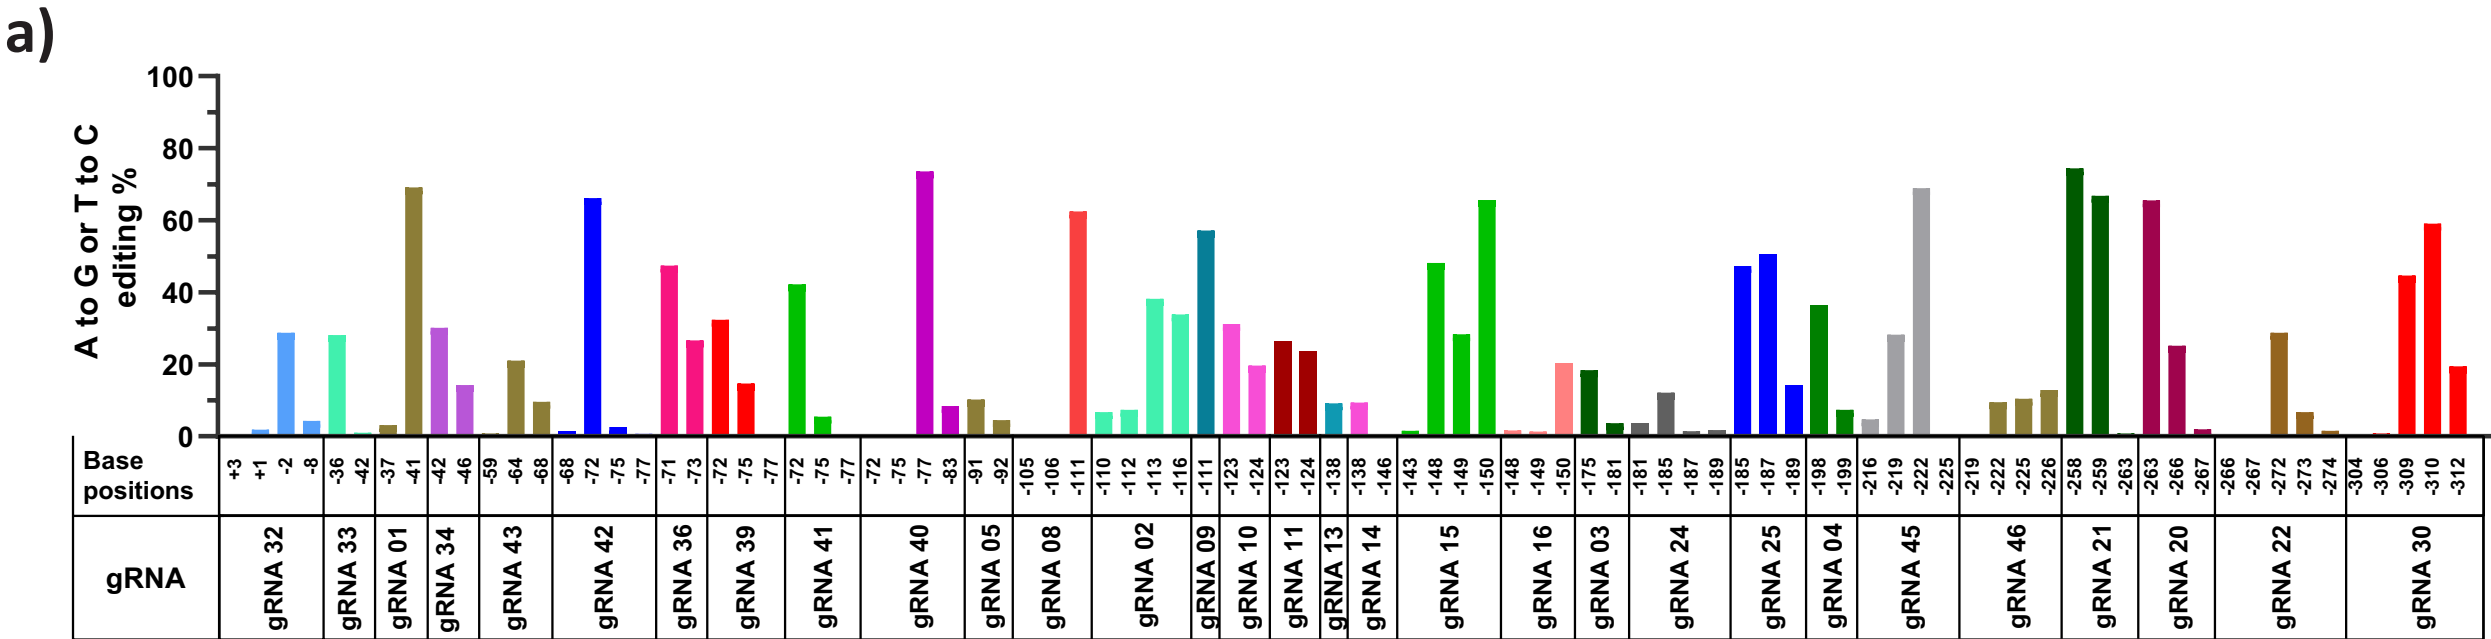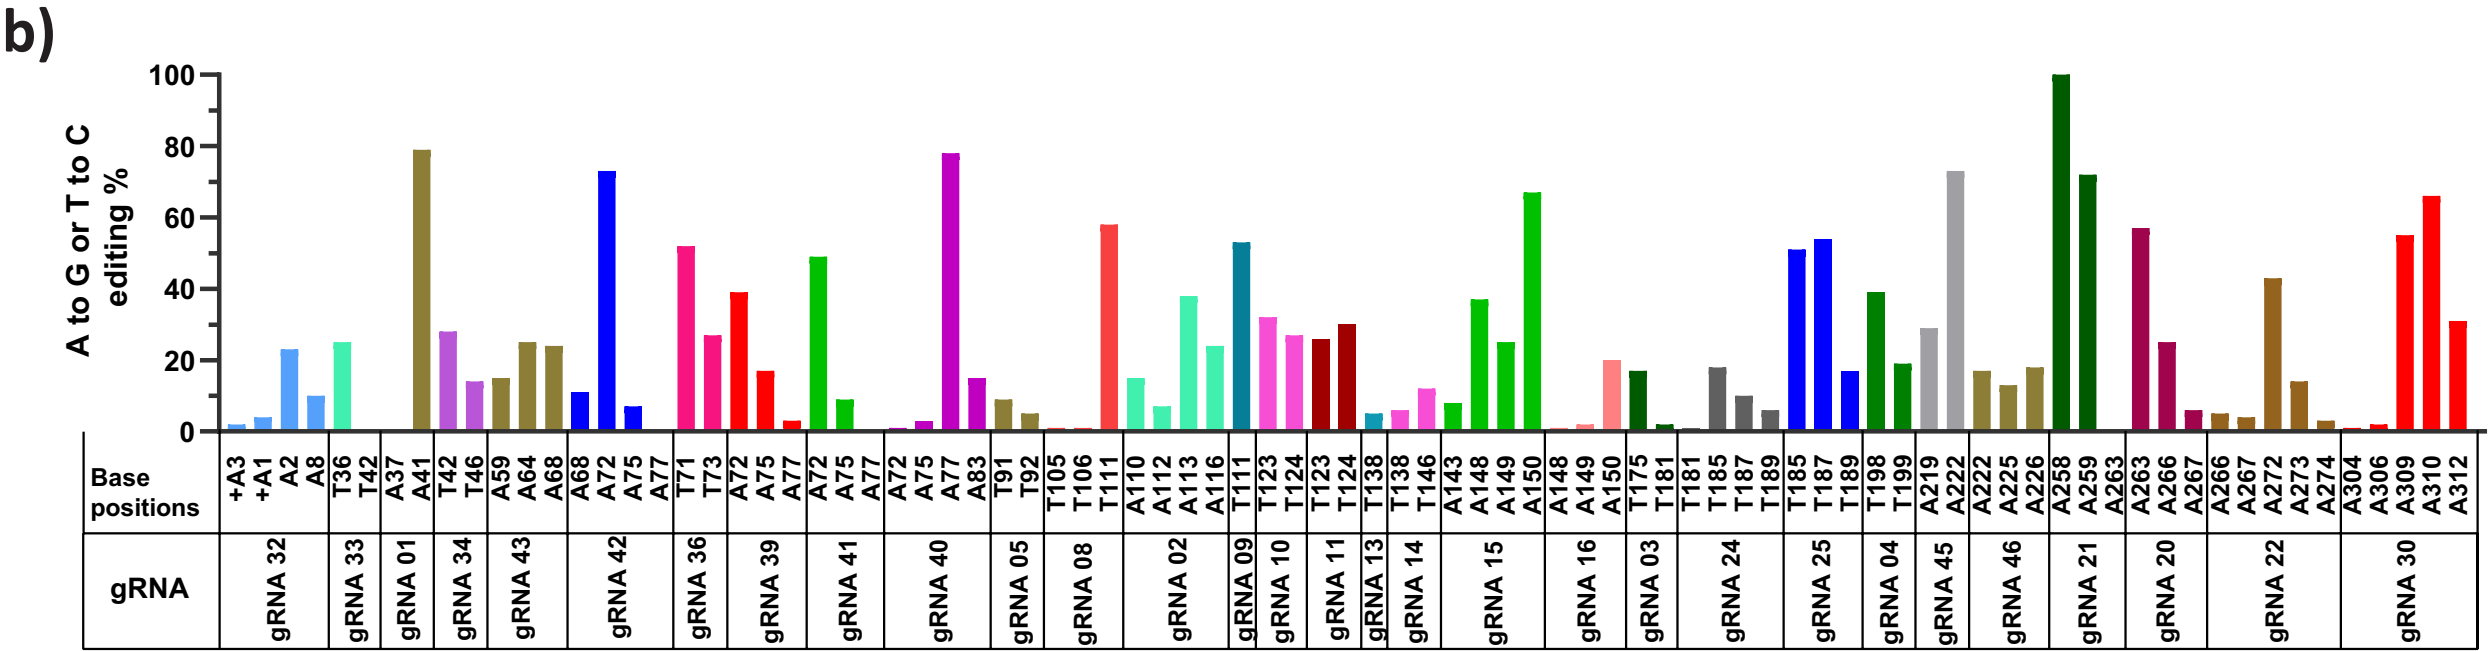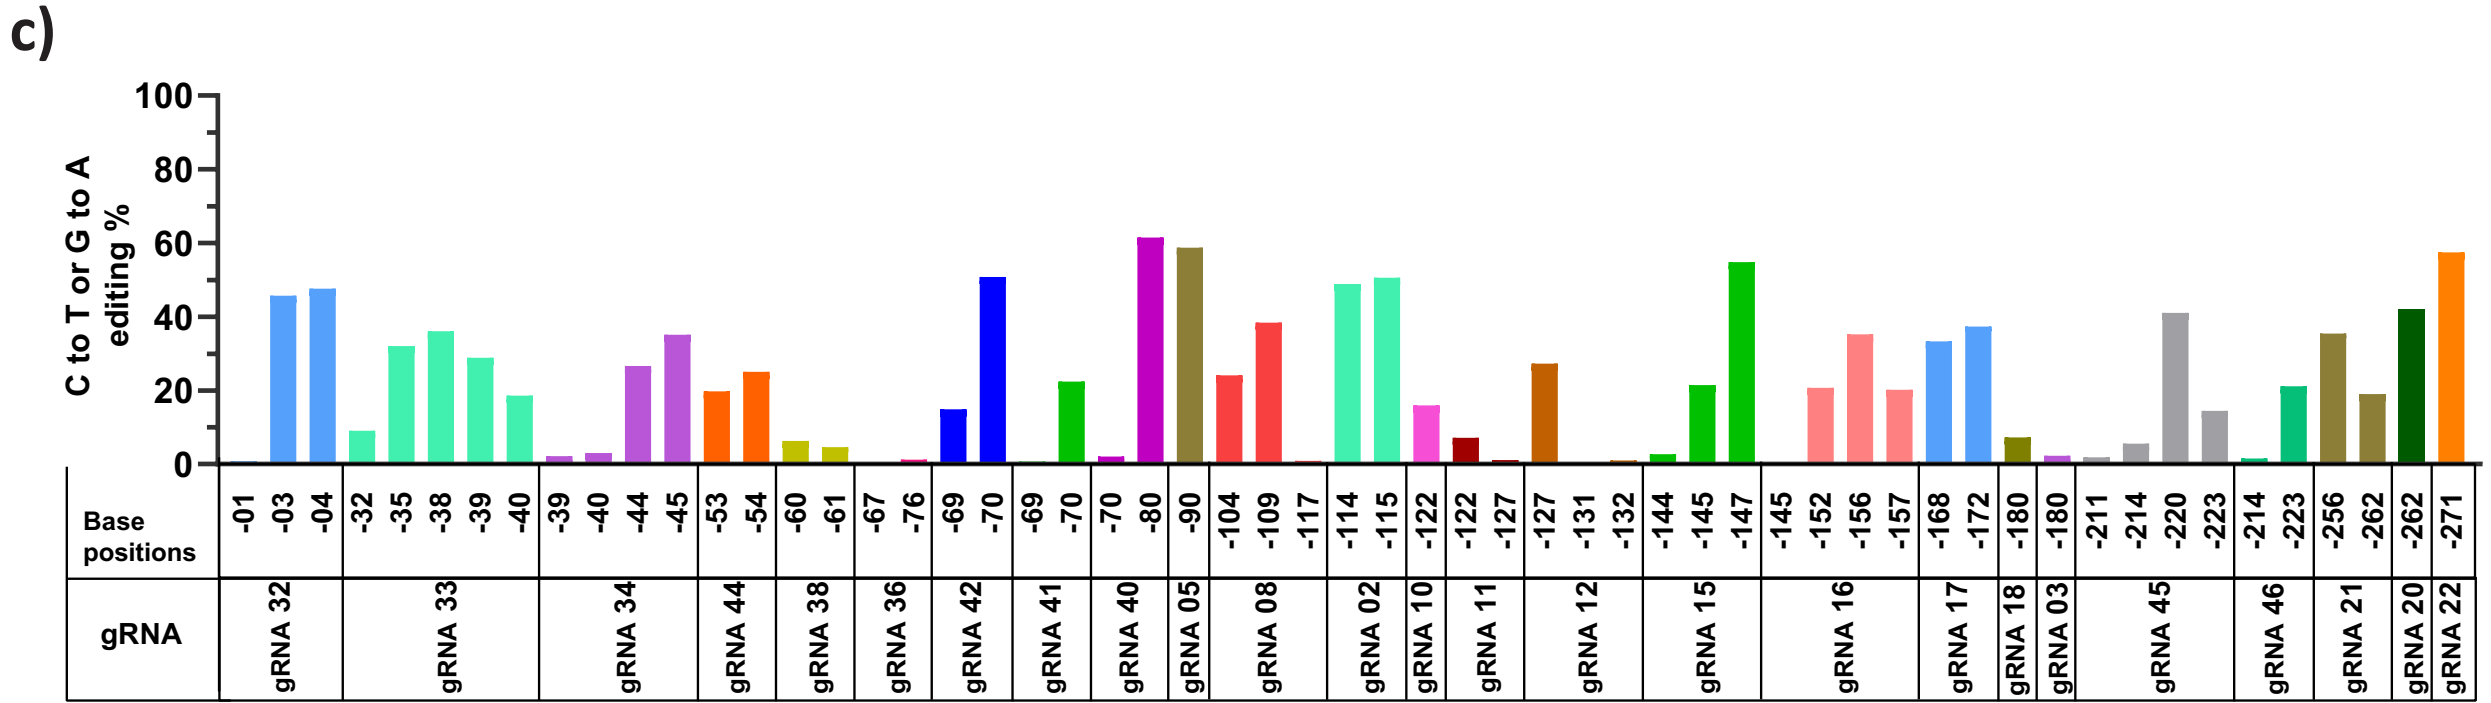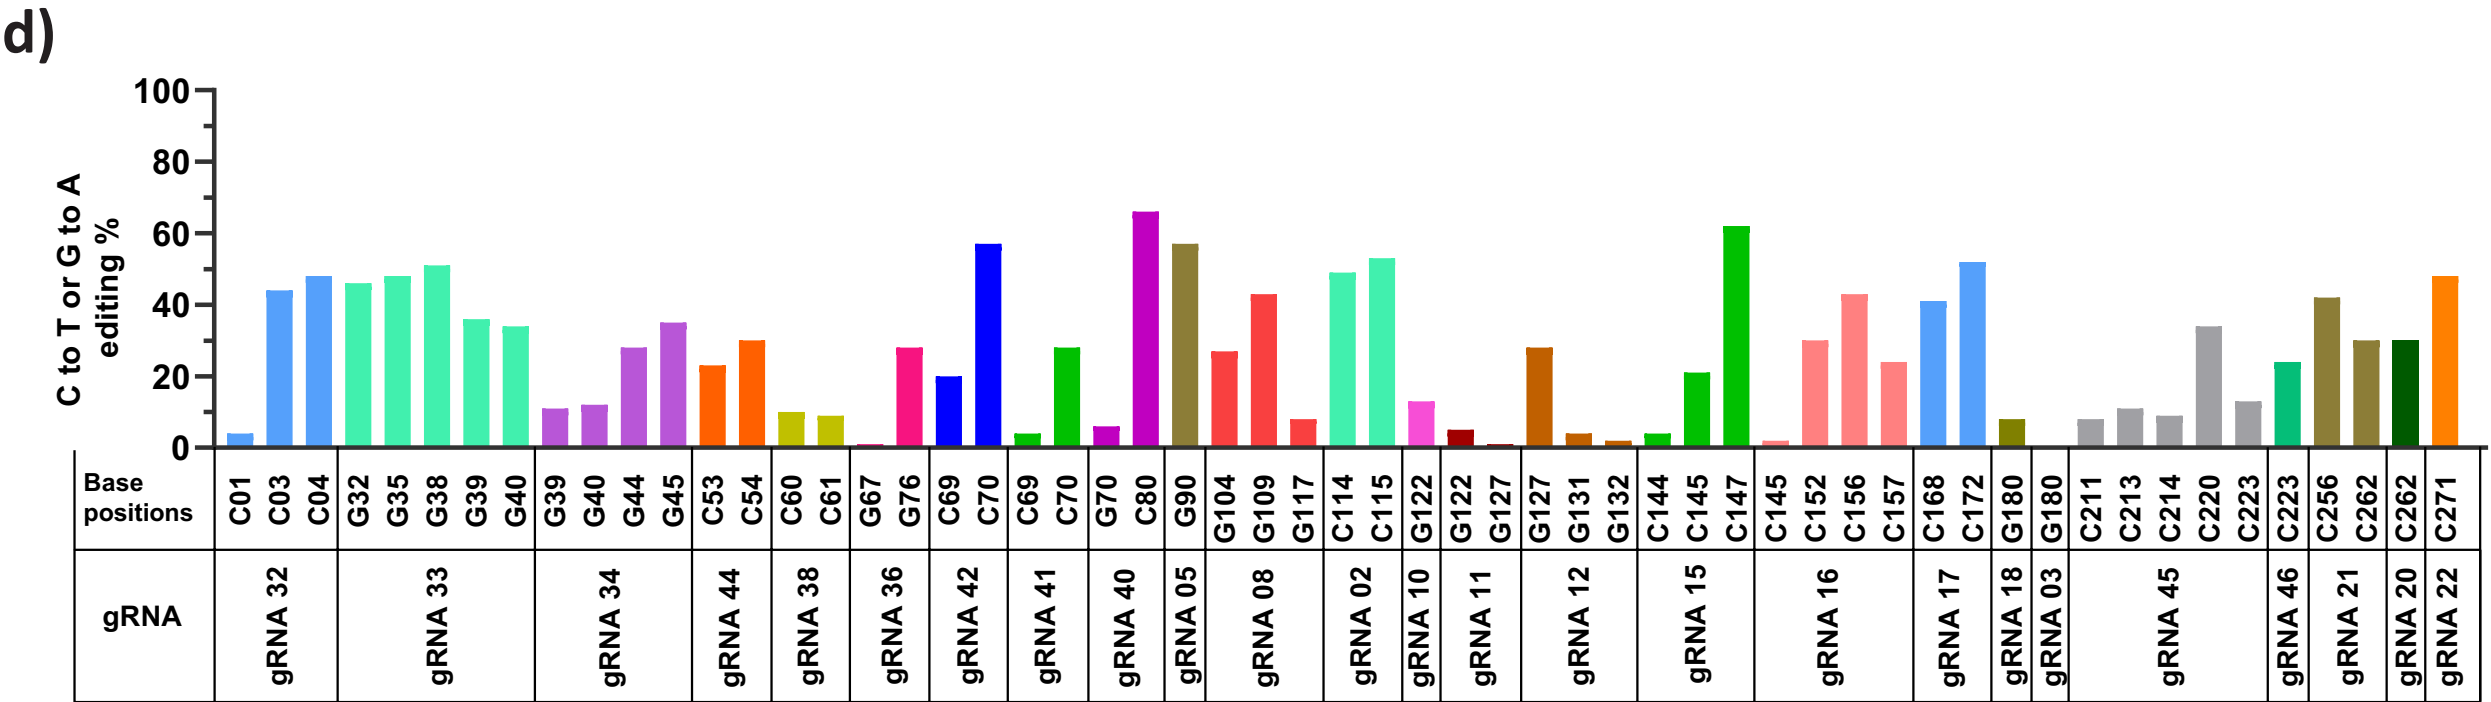

Supplement: supp [file elife-65421-supp-v1.zip]

a)

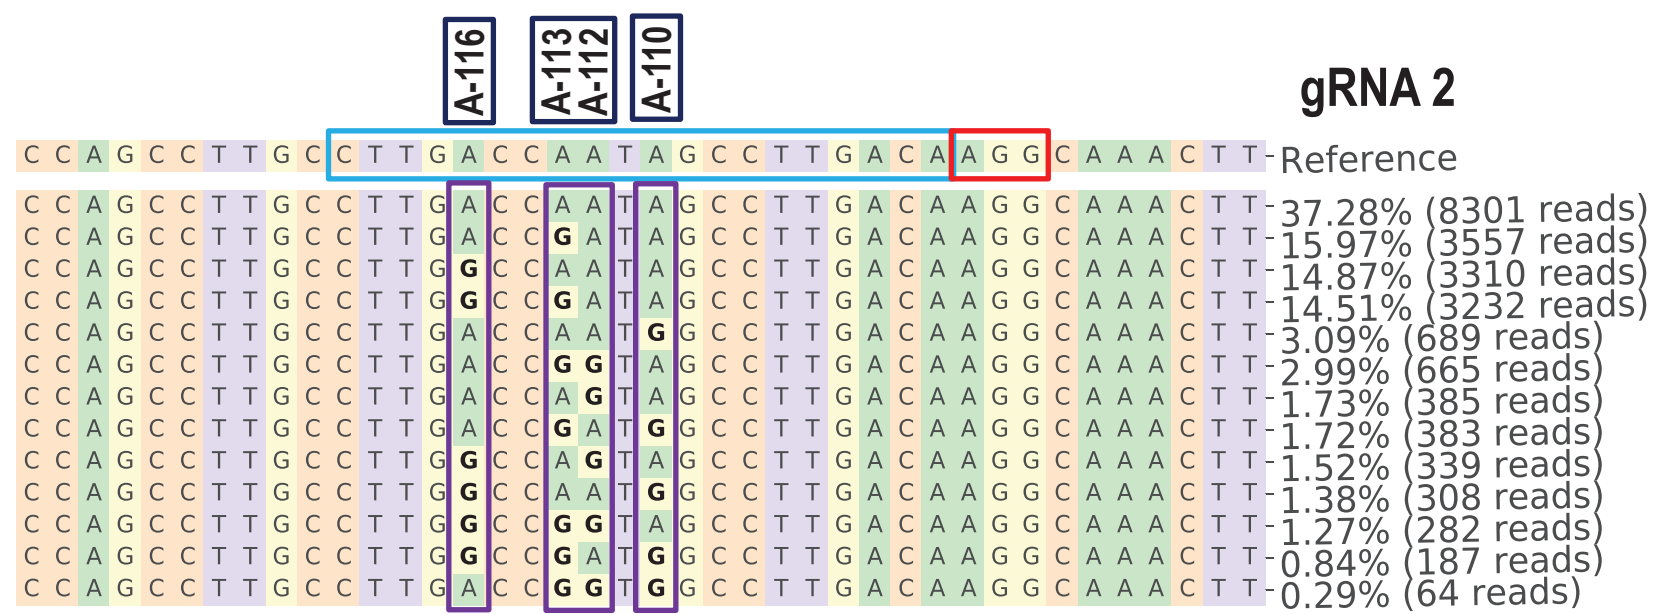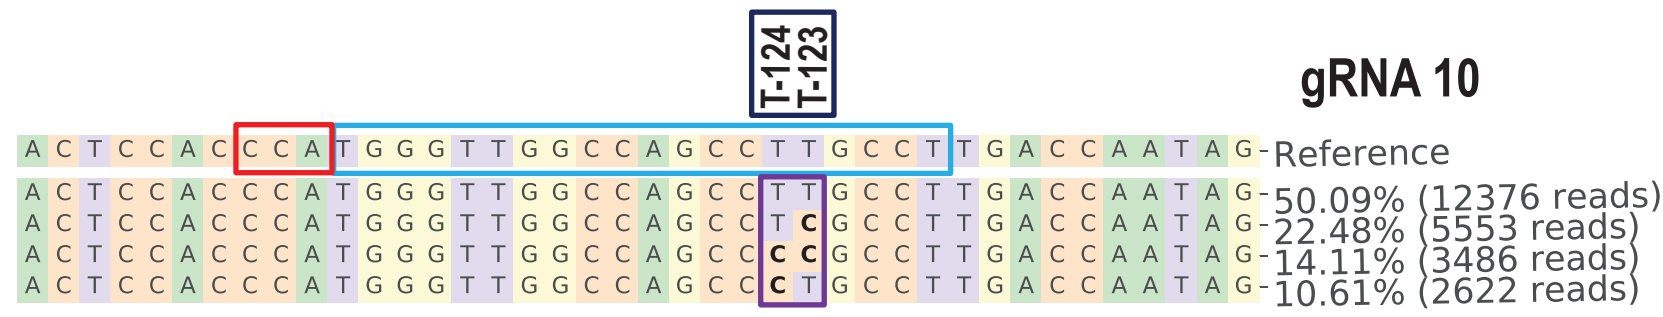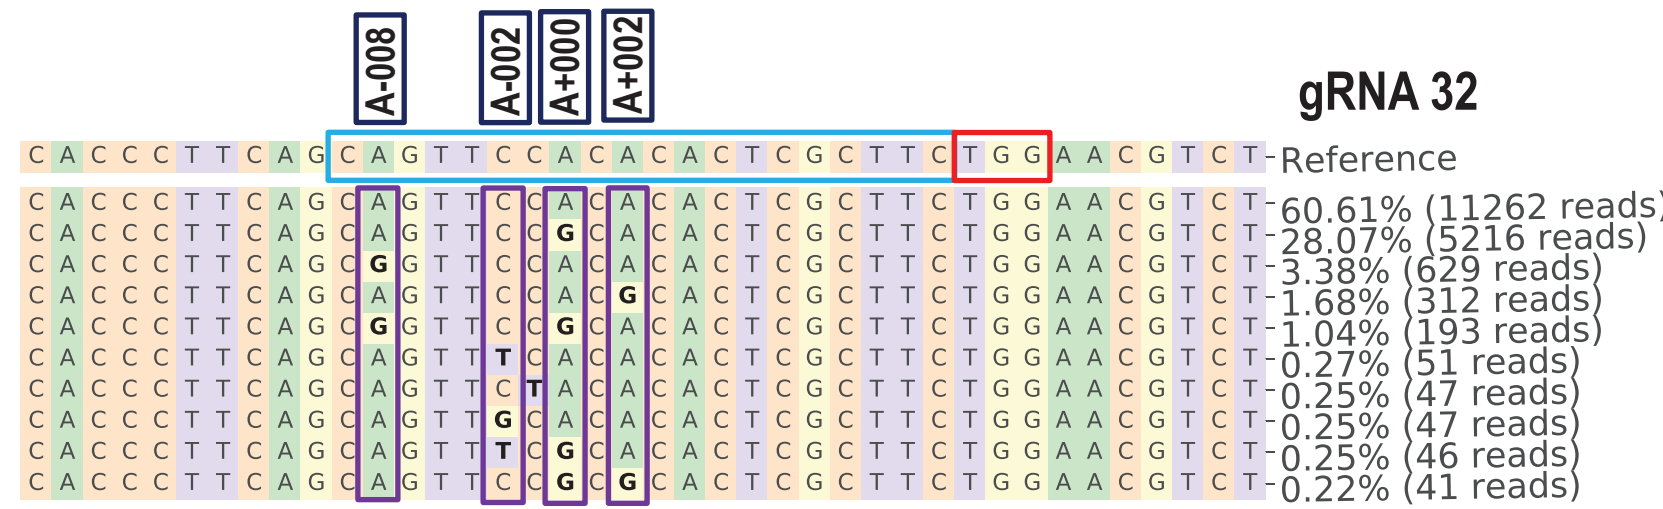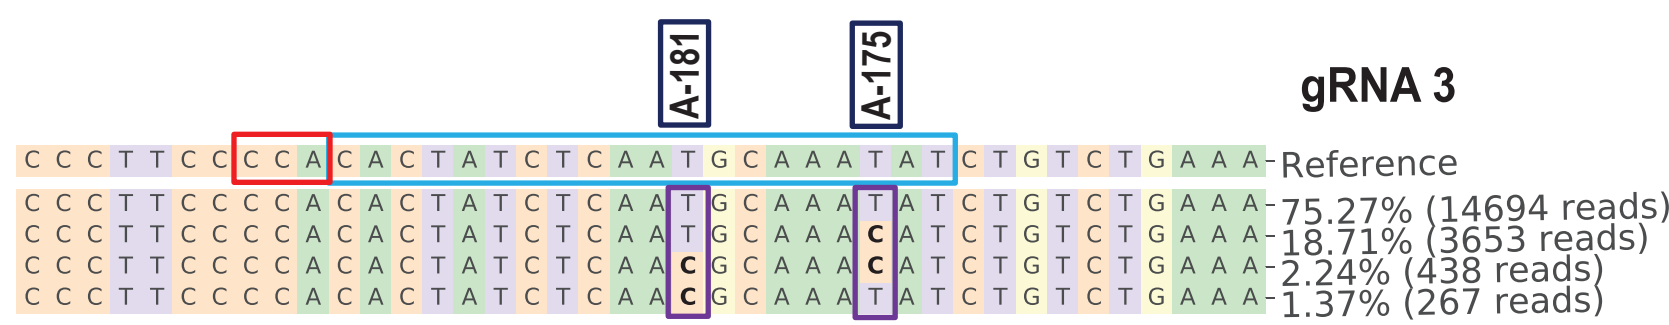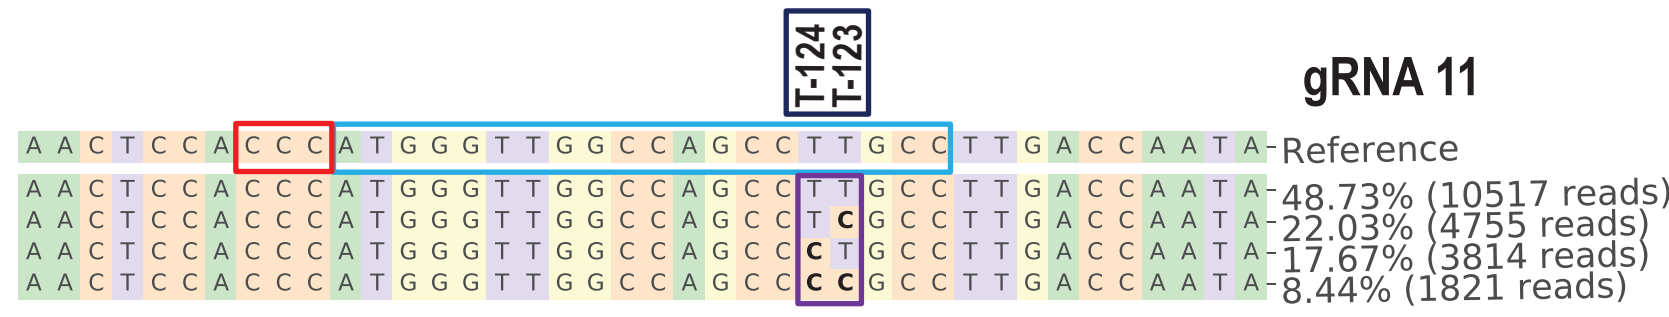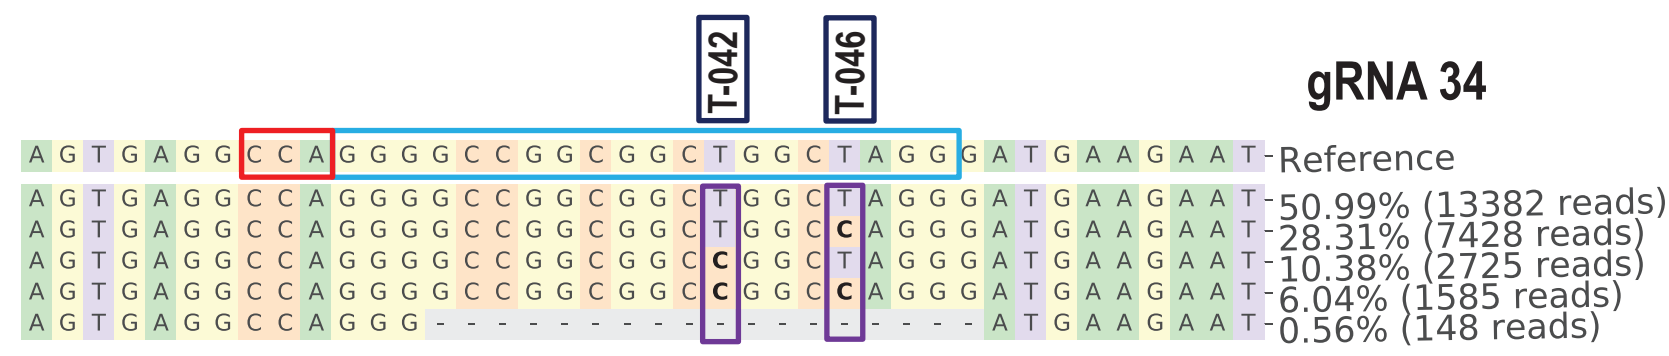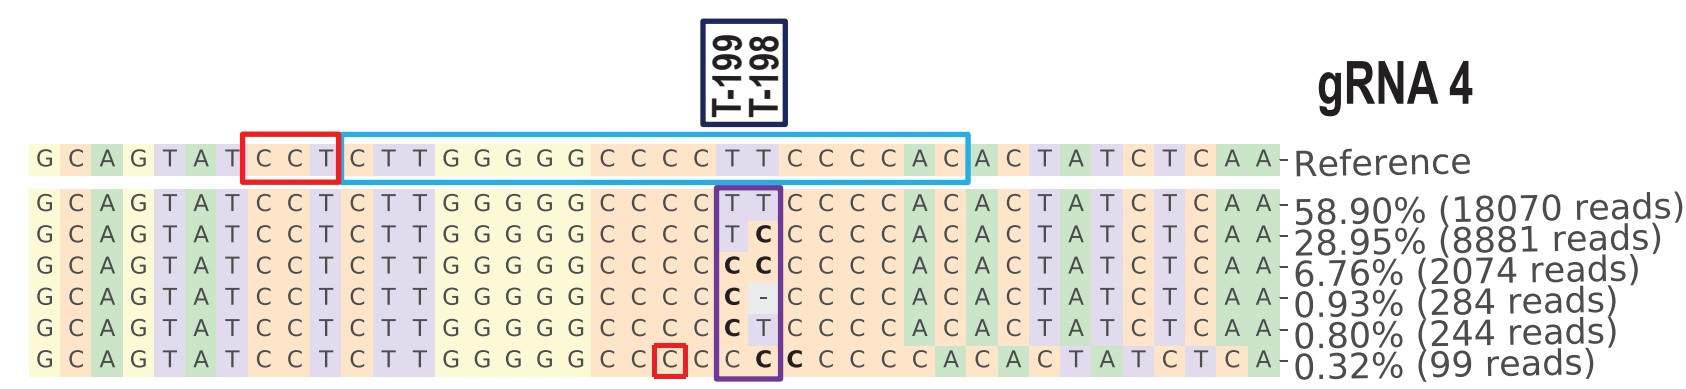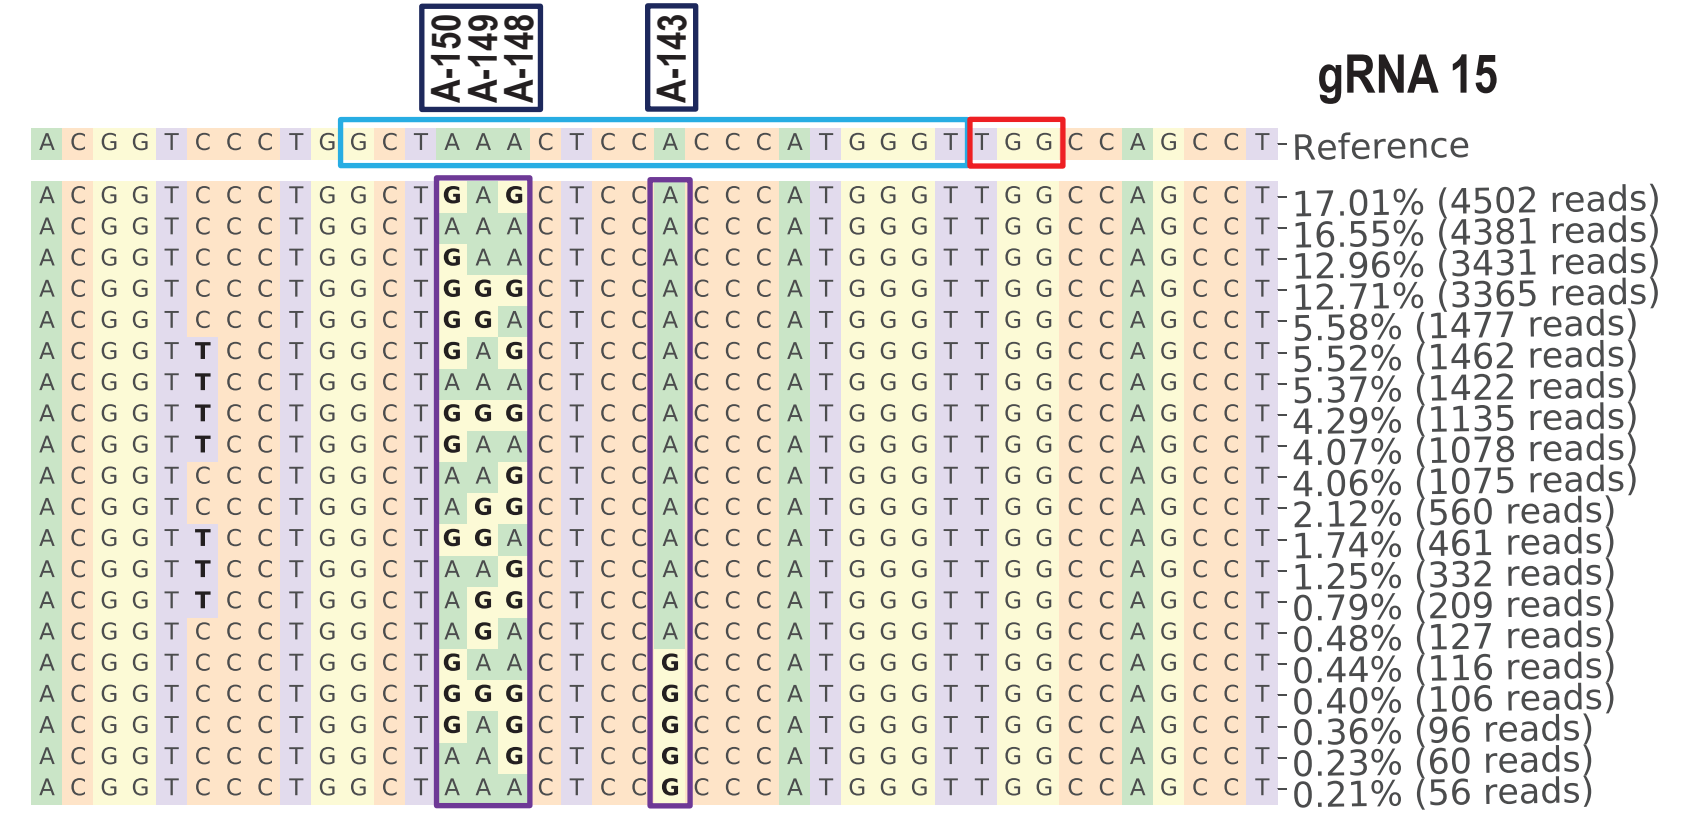

b)

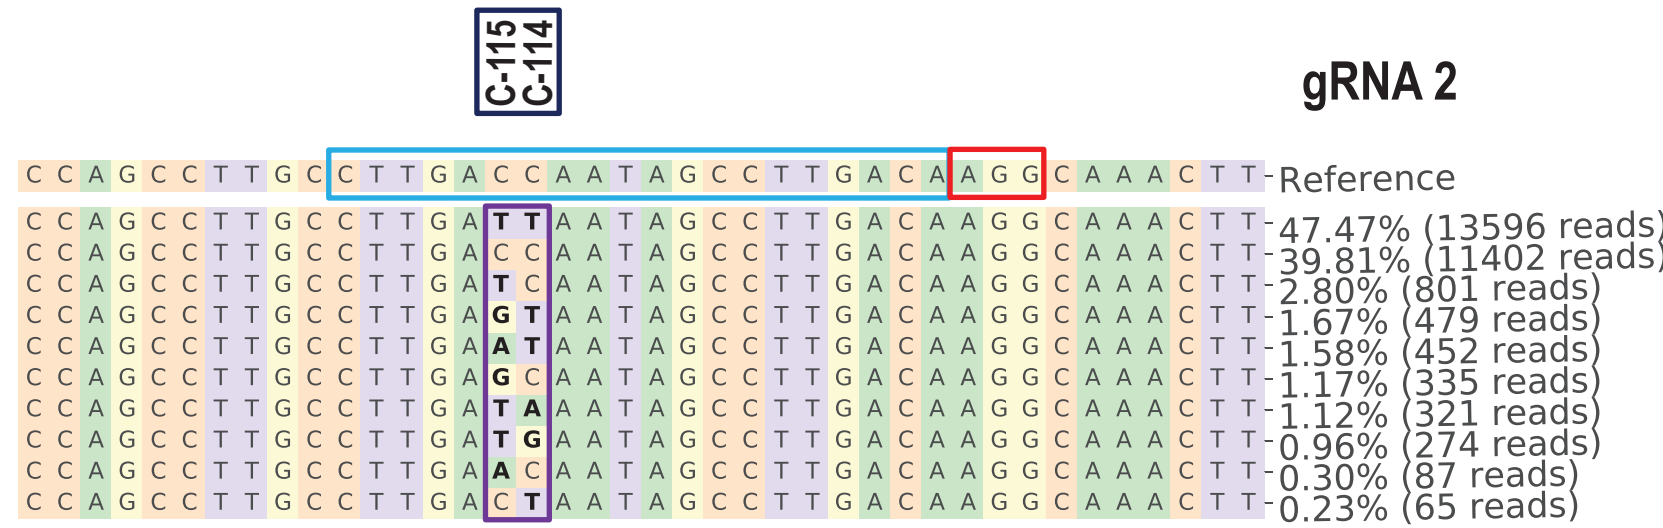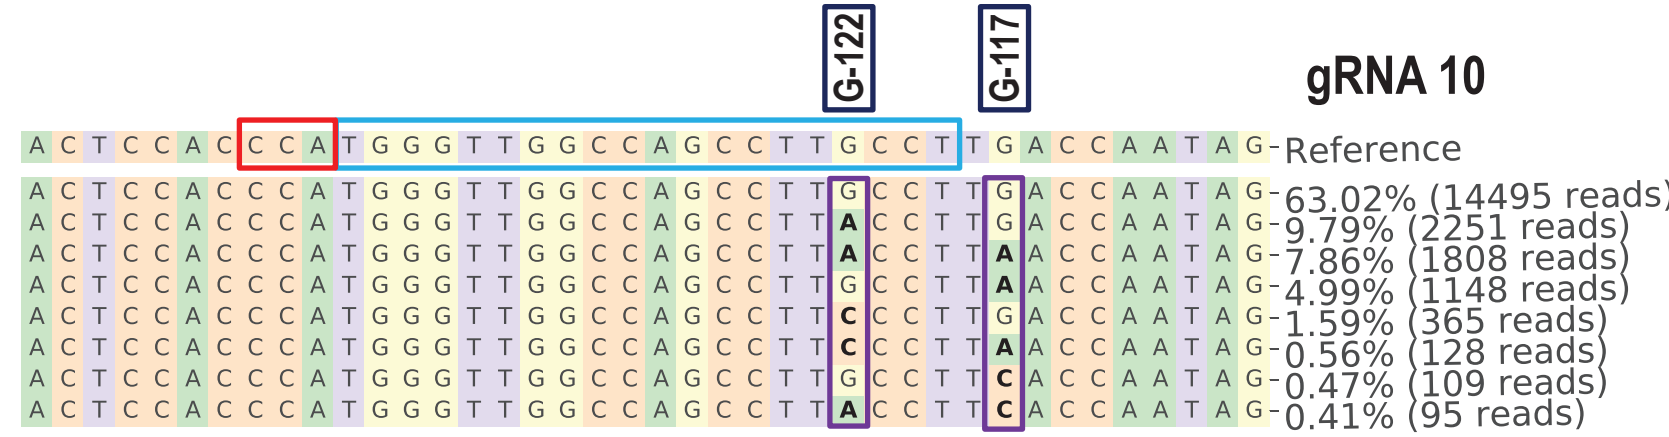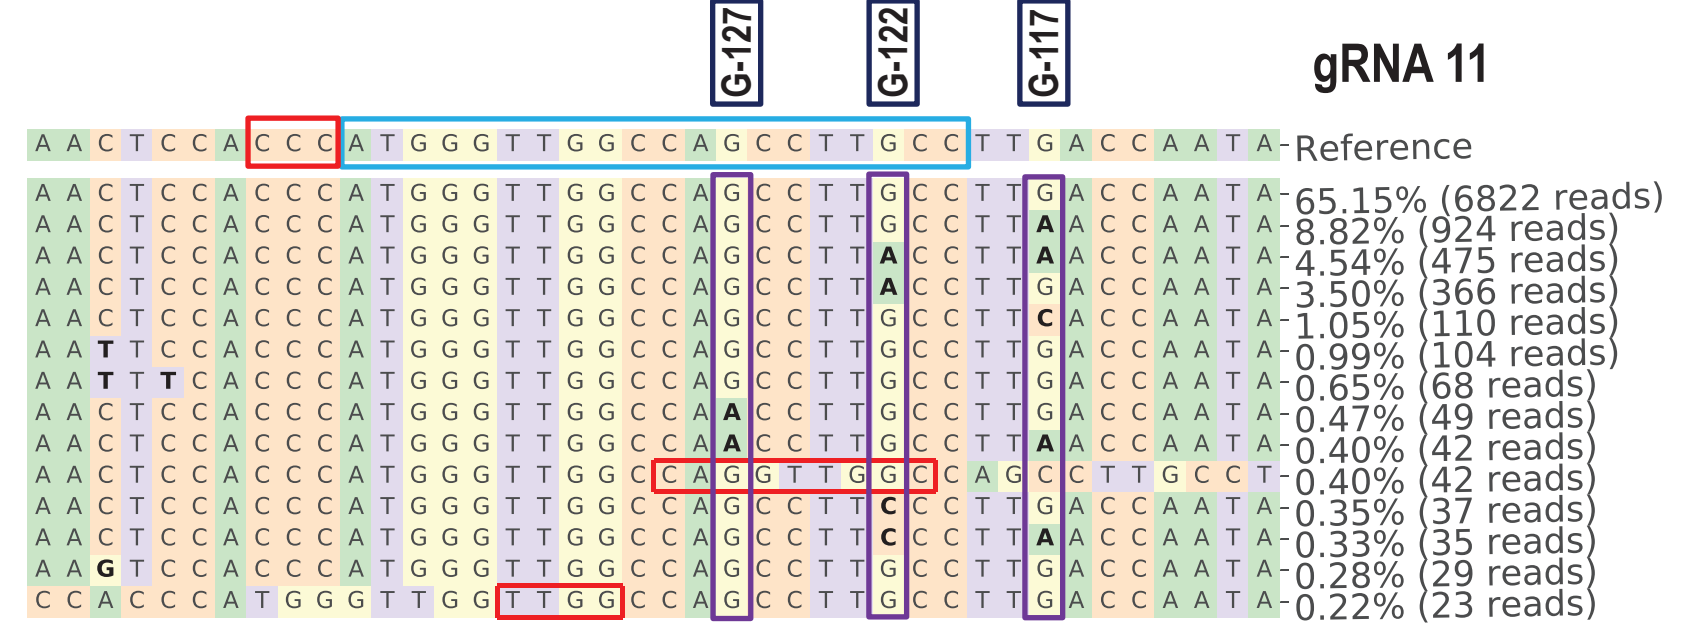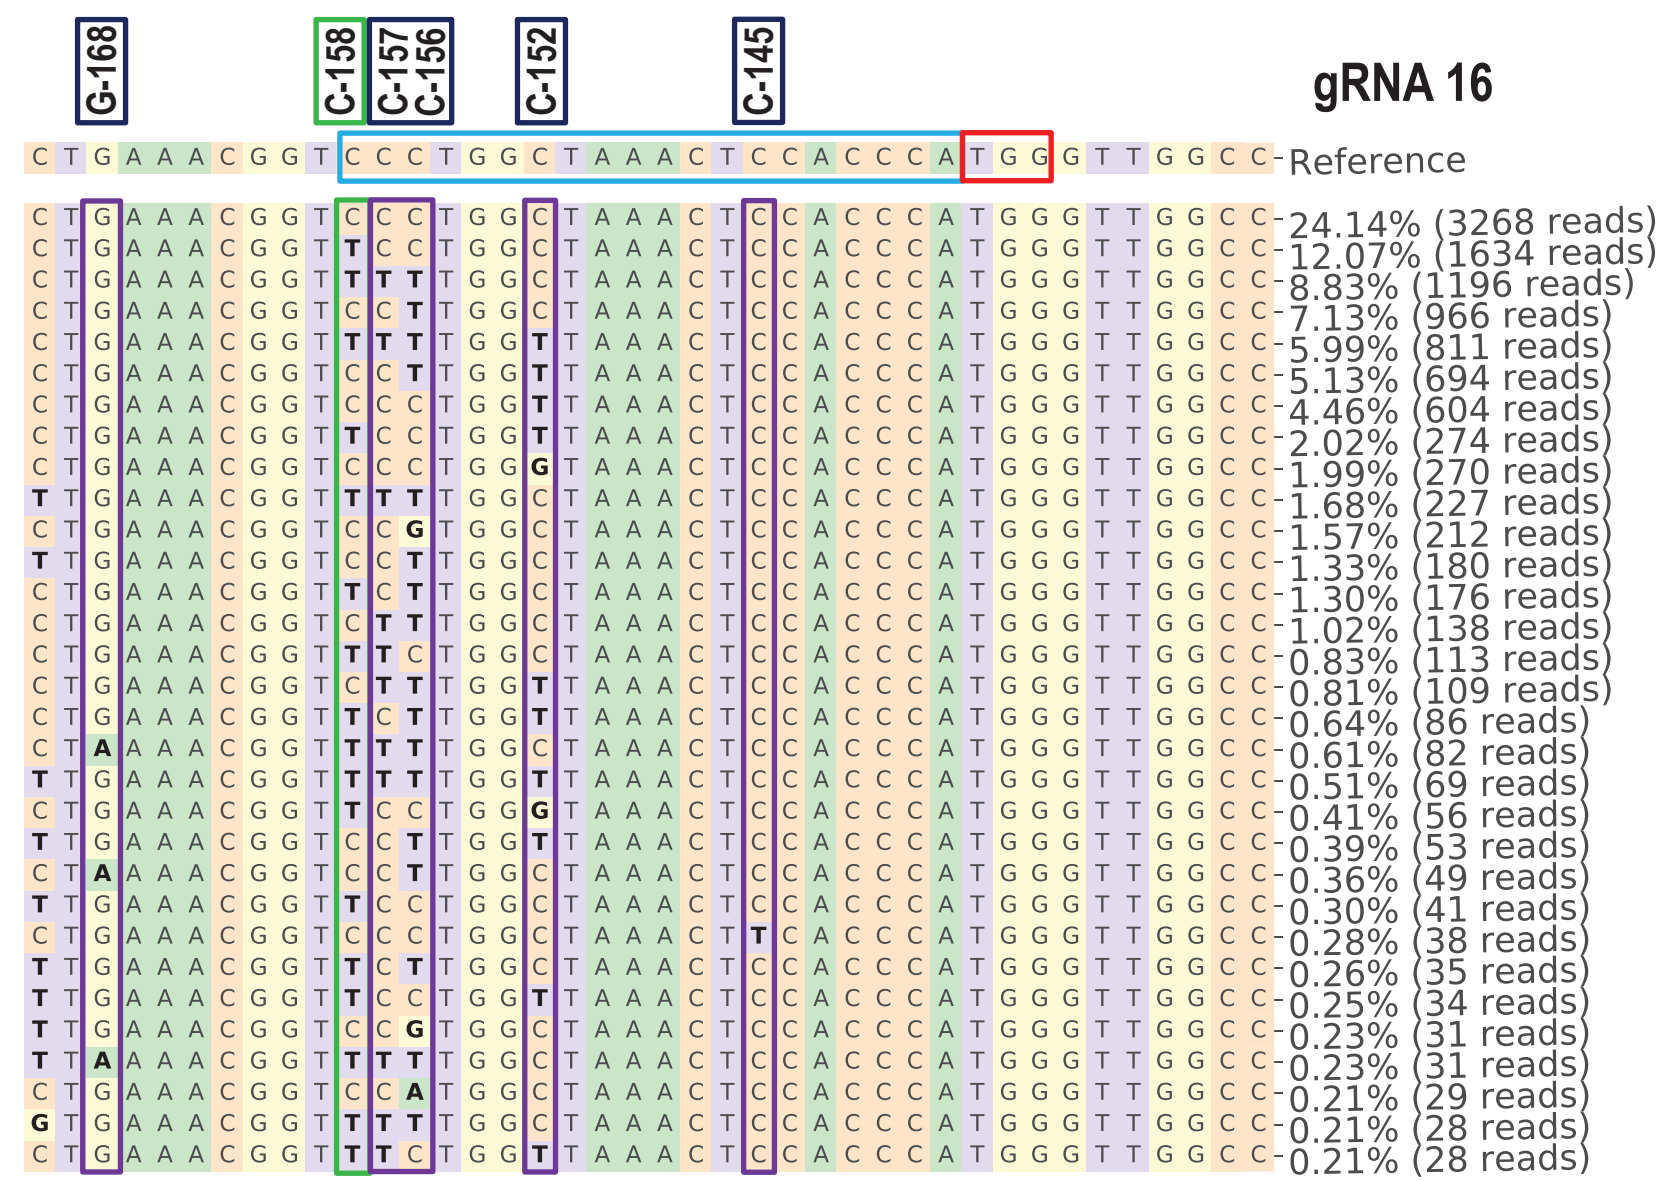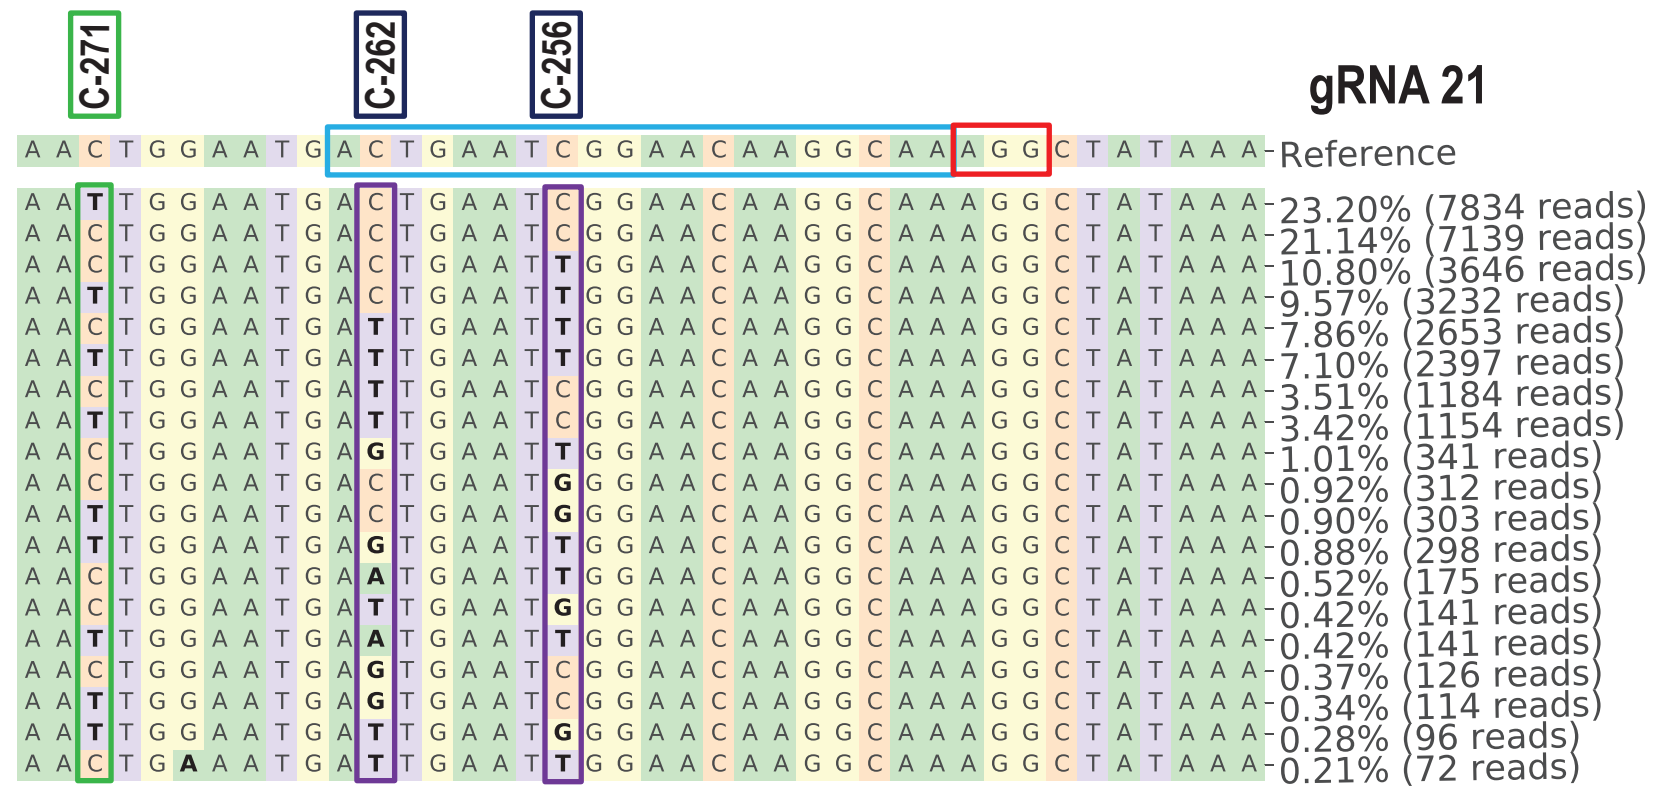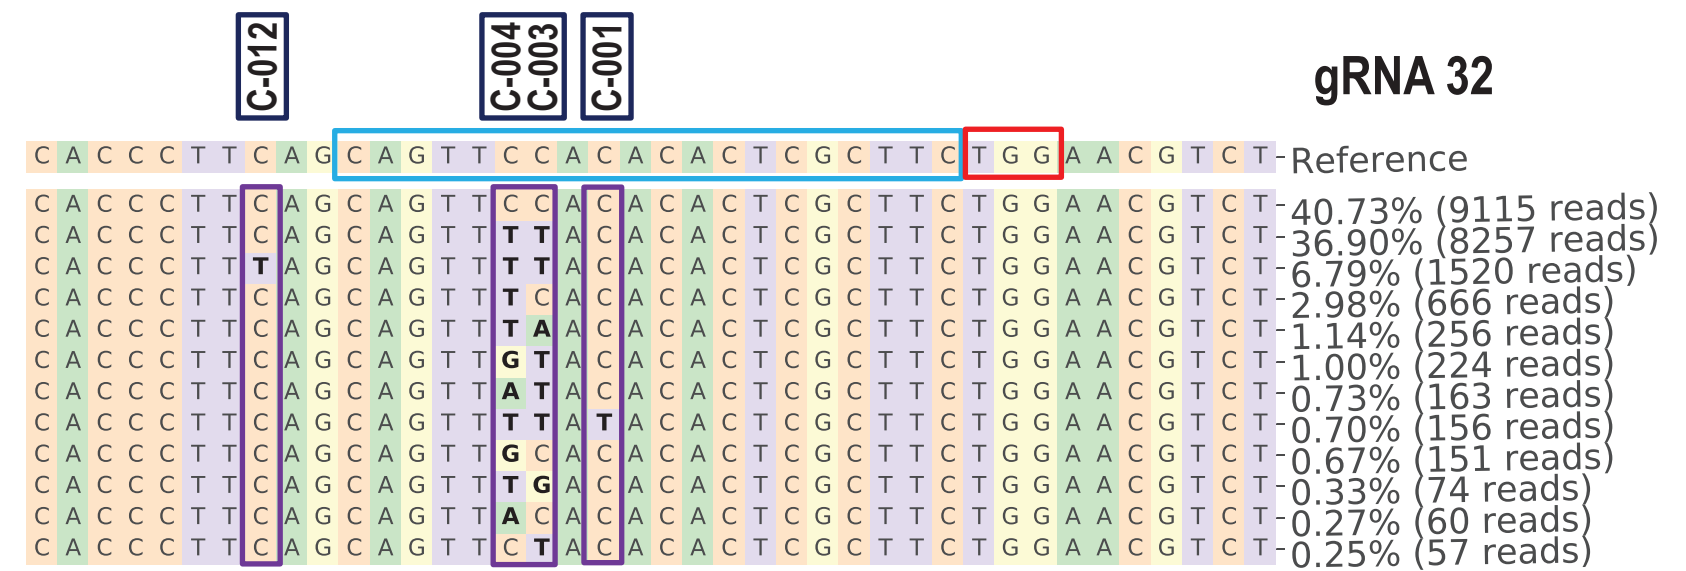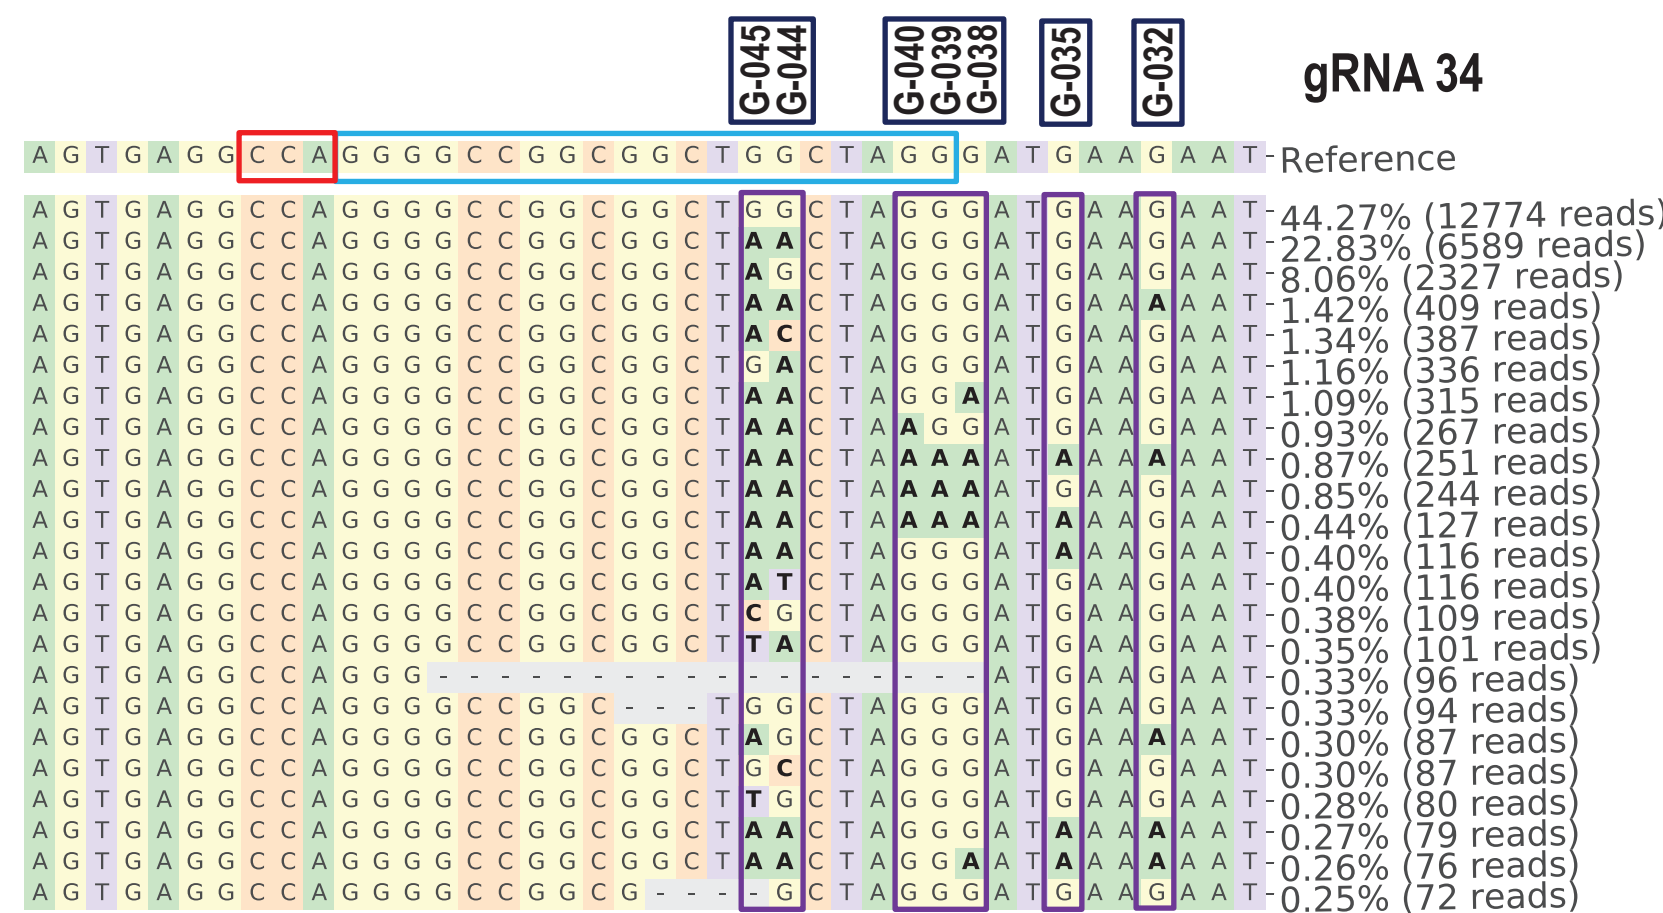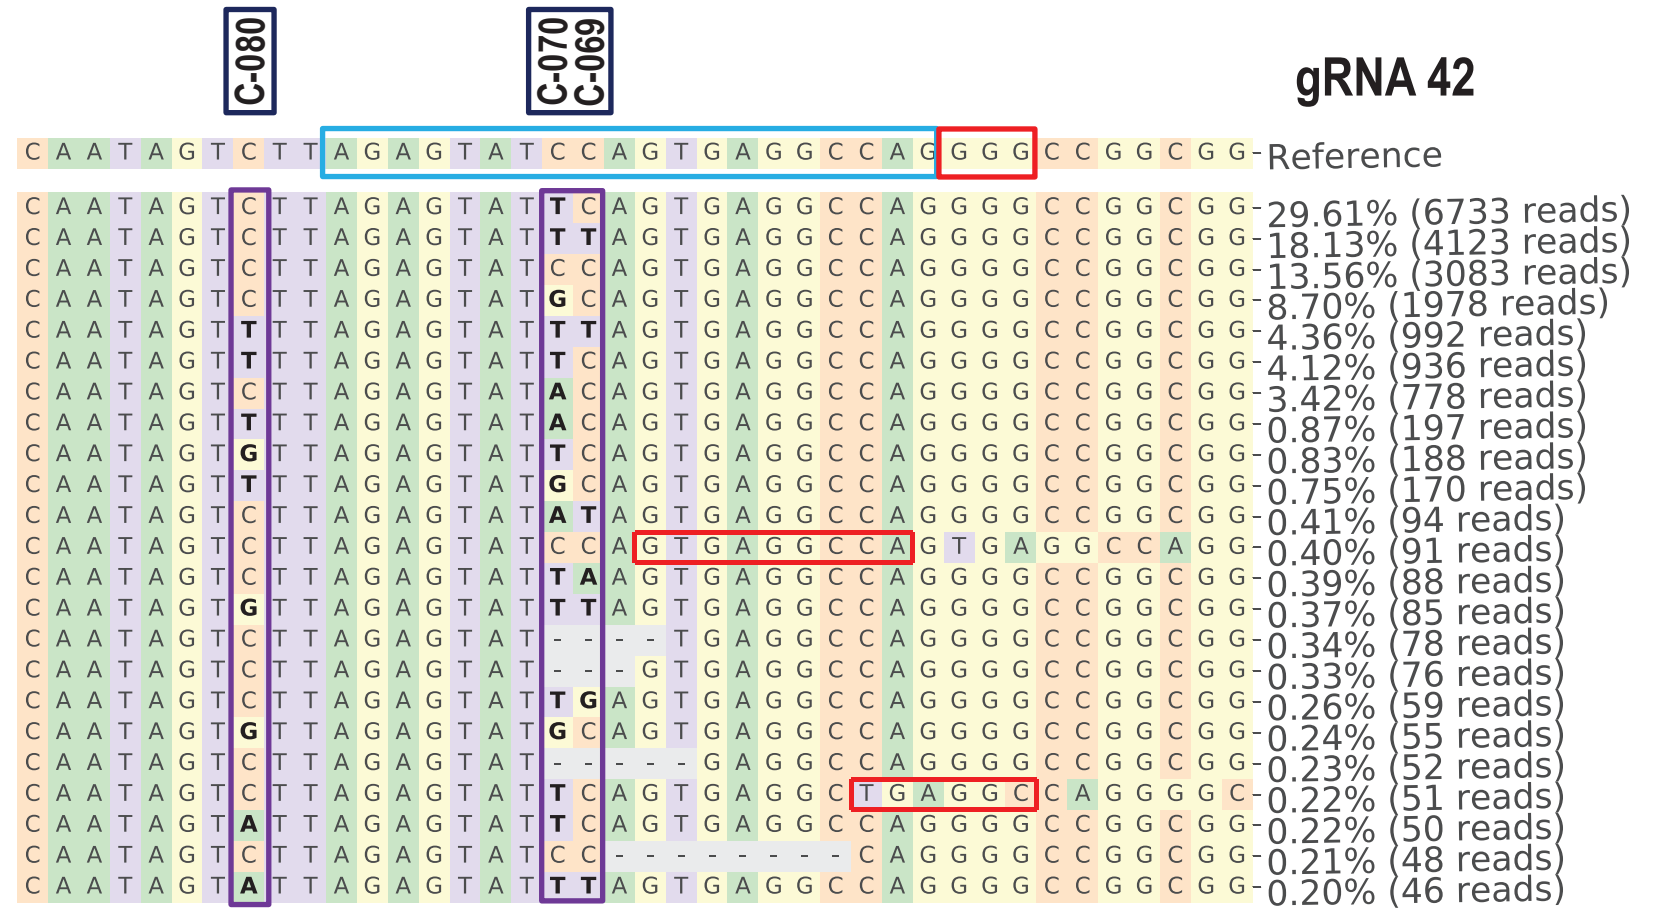

- PAM  
- Guide  
- Substitution  
- Insertion  
- Natural variations  
- Deletions

Supplement: supp [file elife-65421-supp-v1.zip]

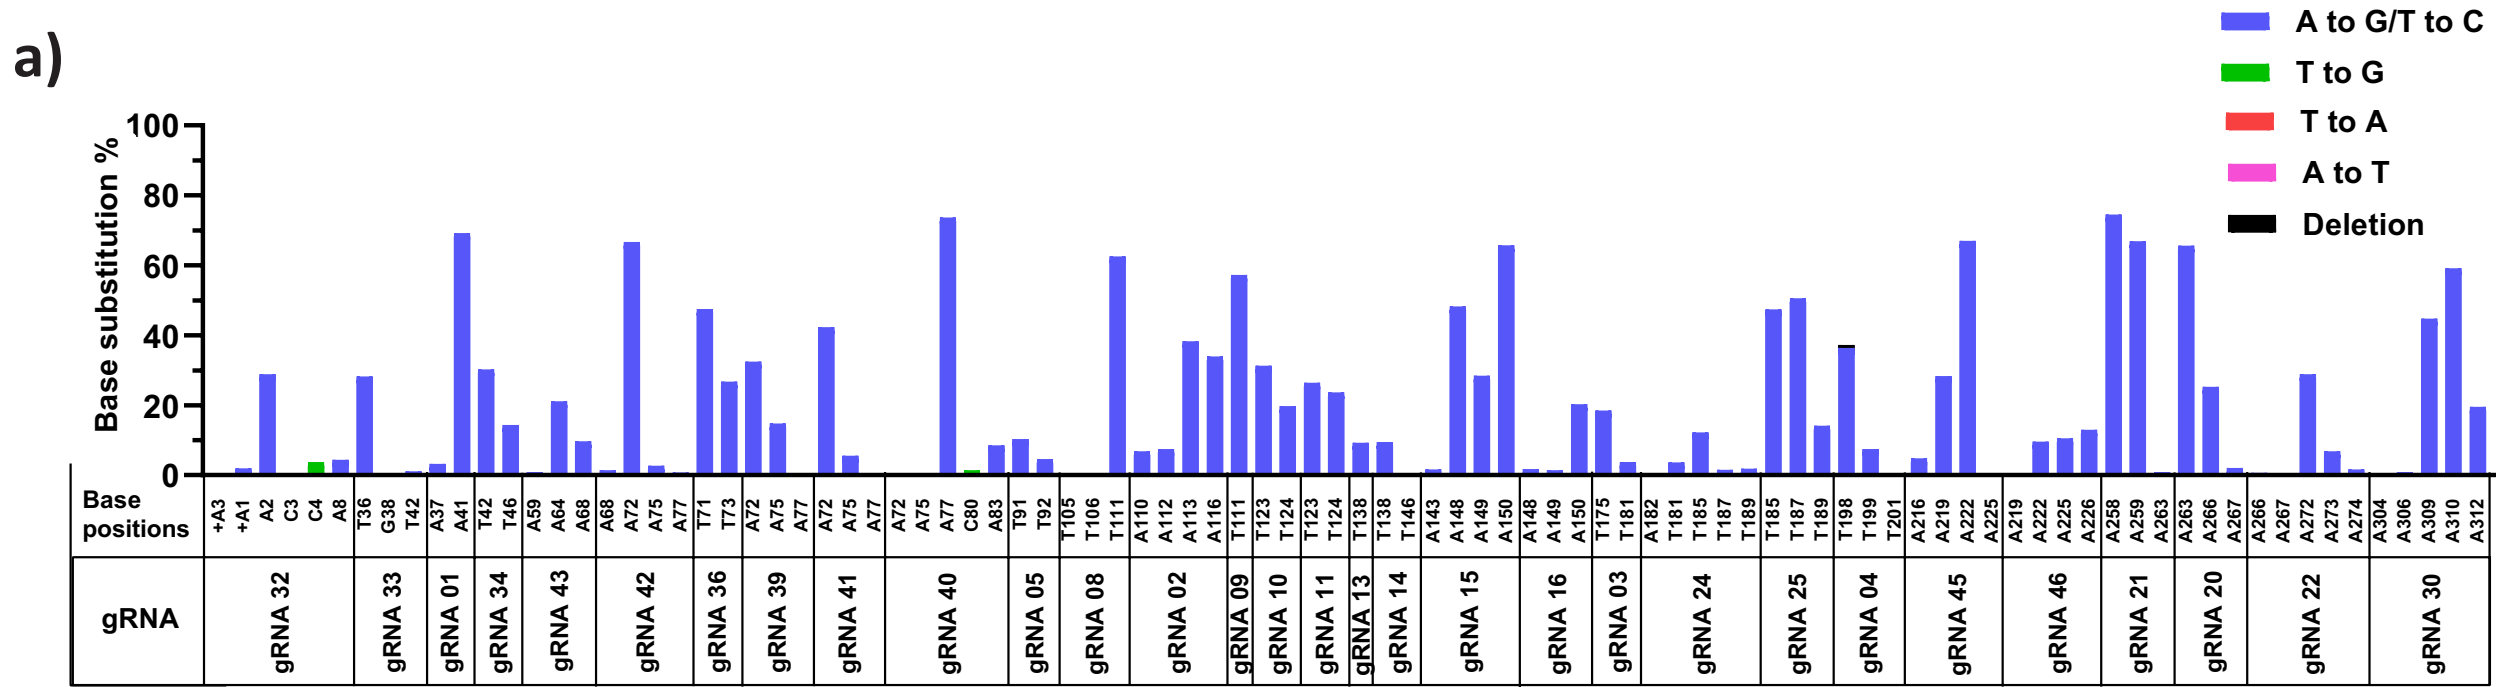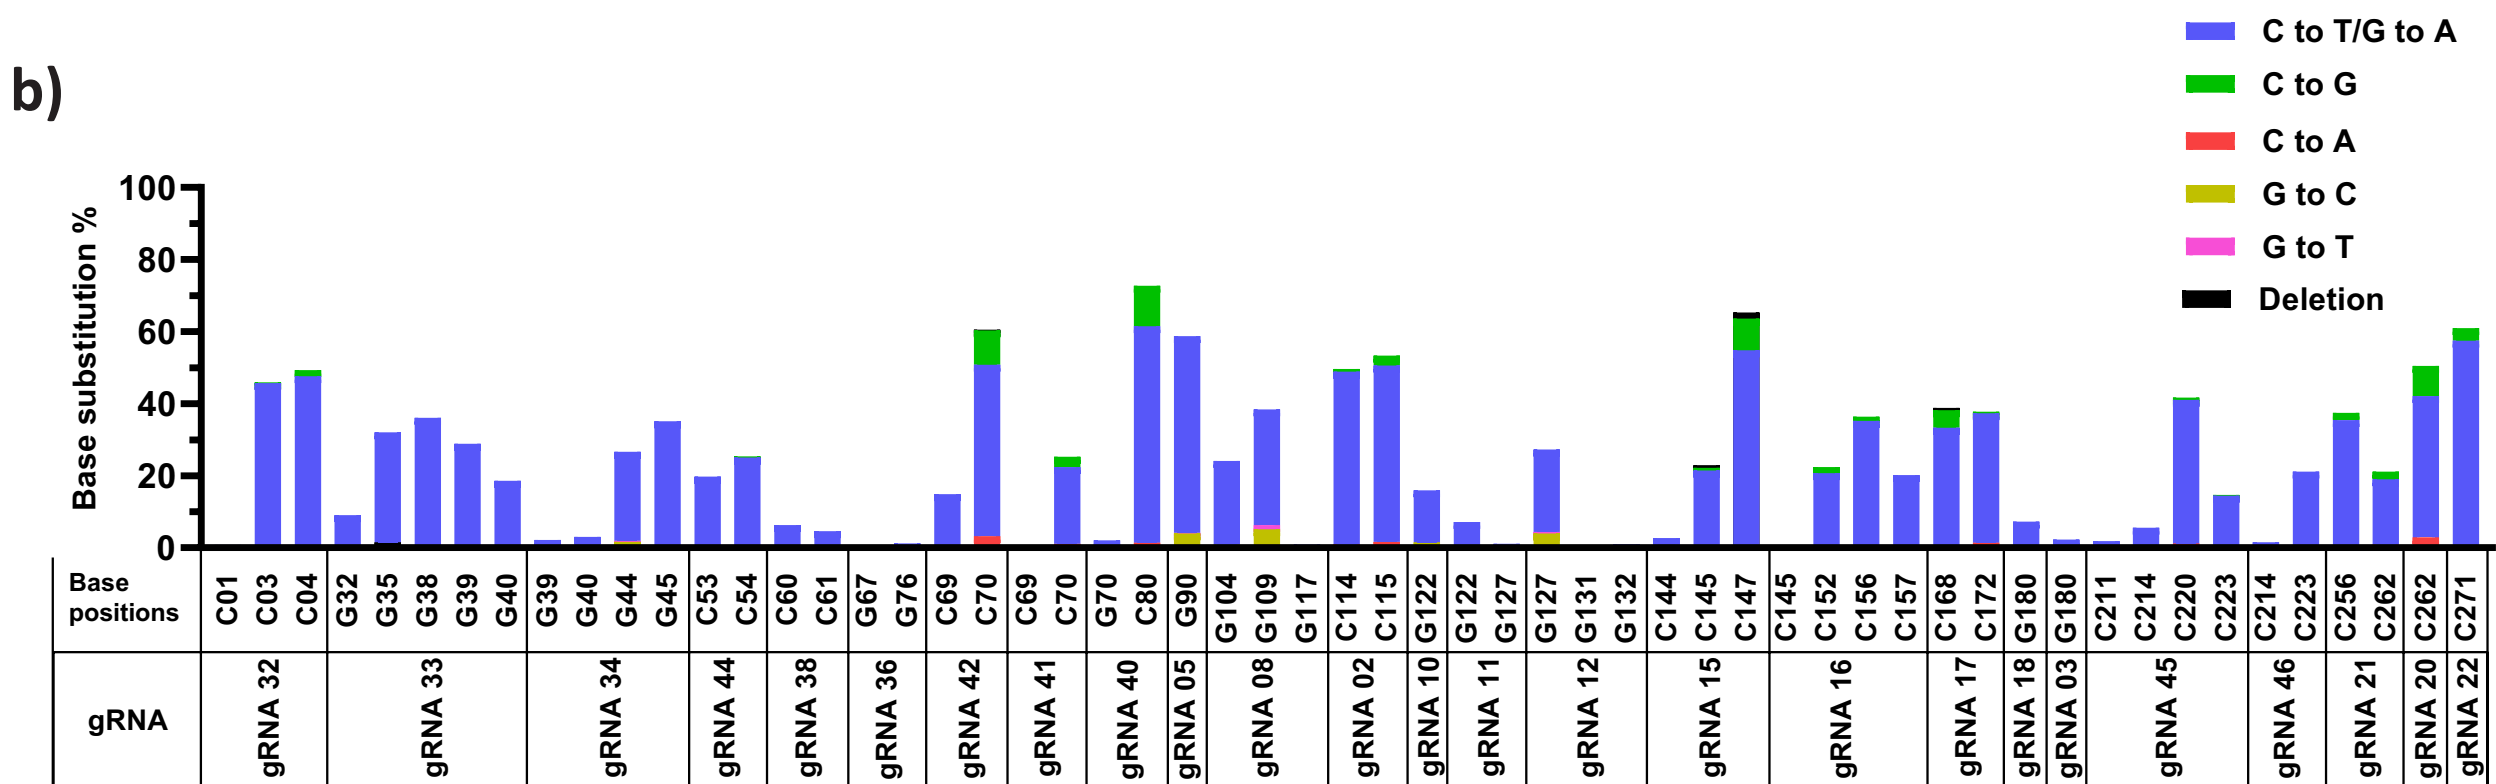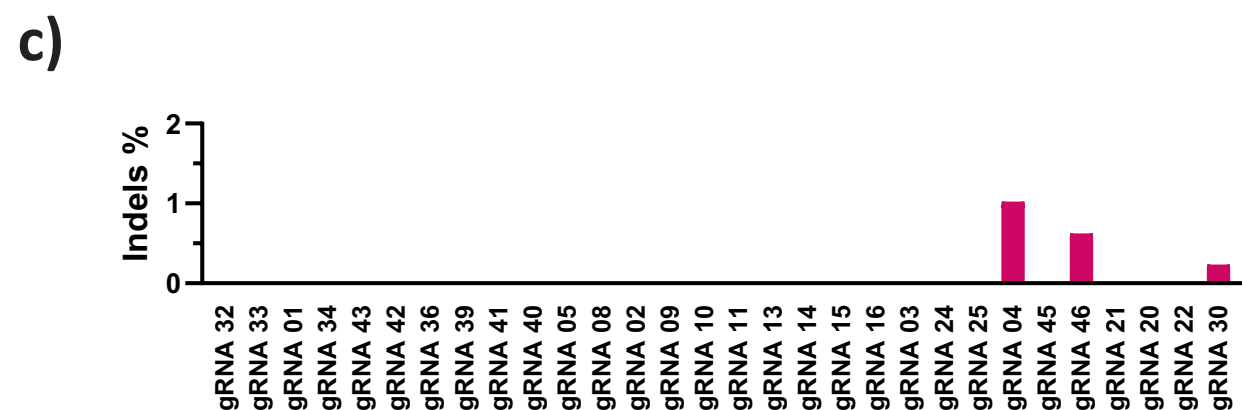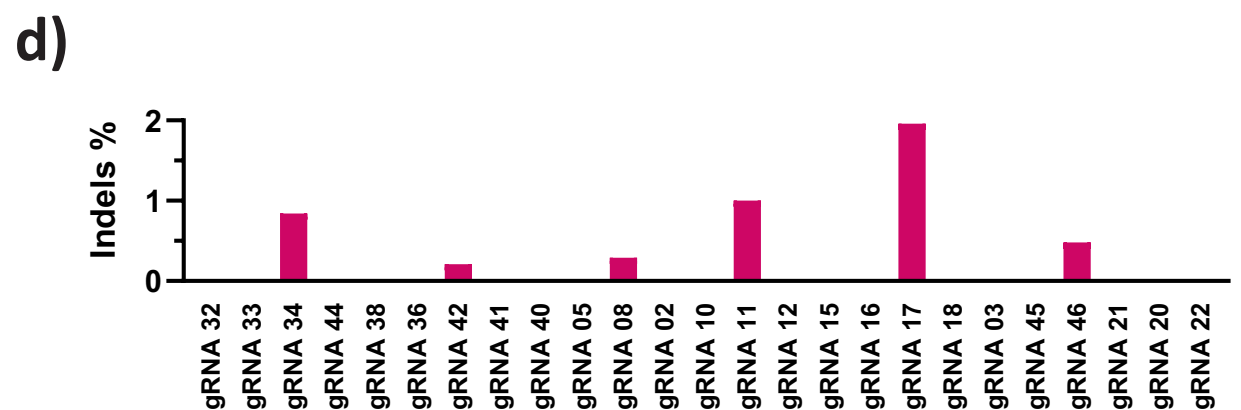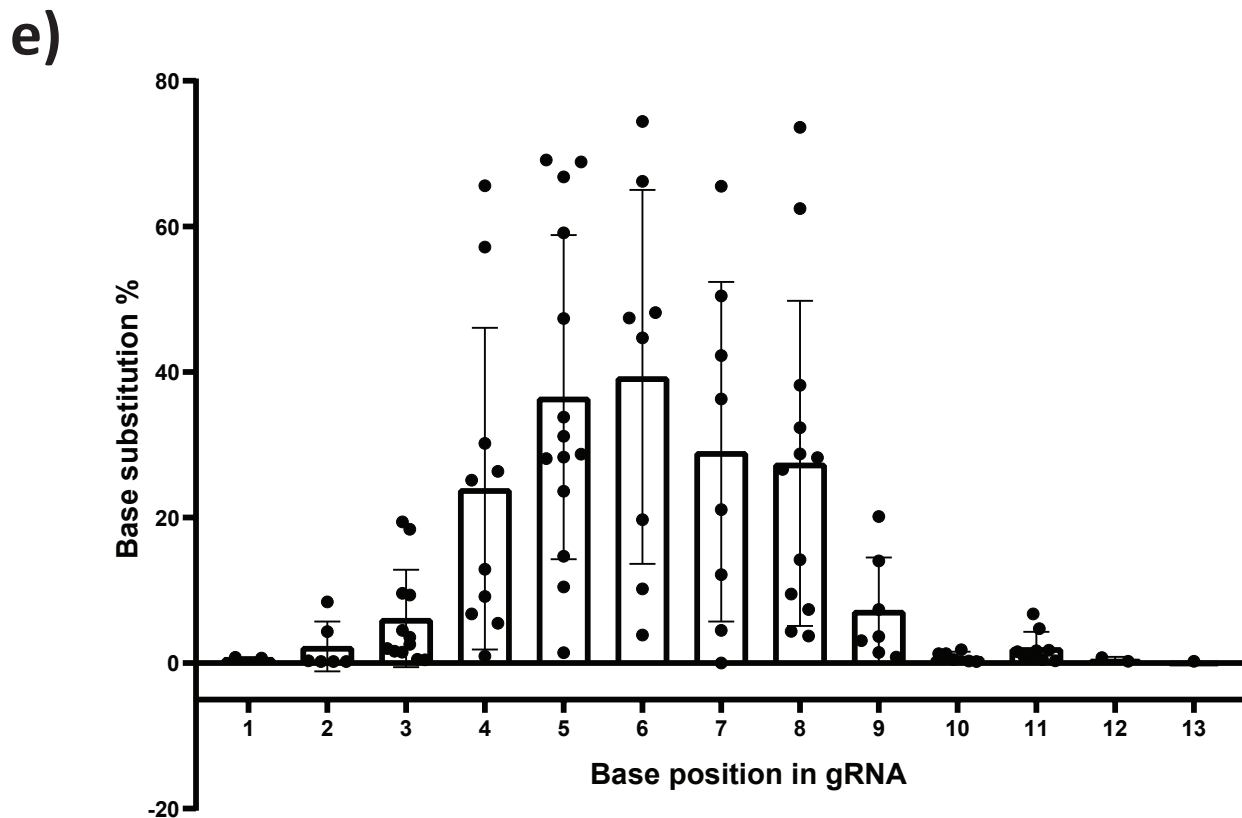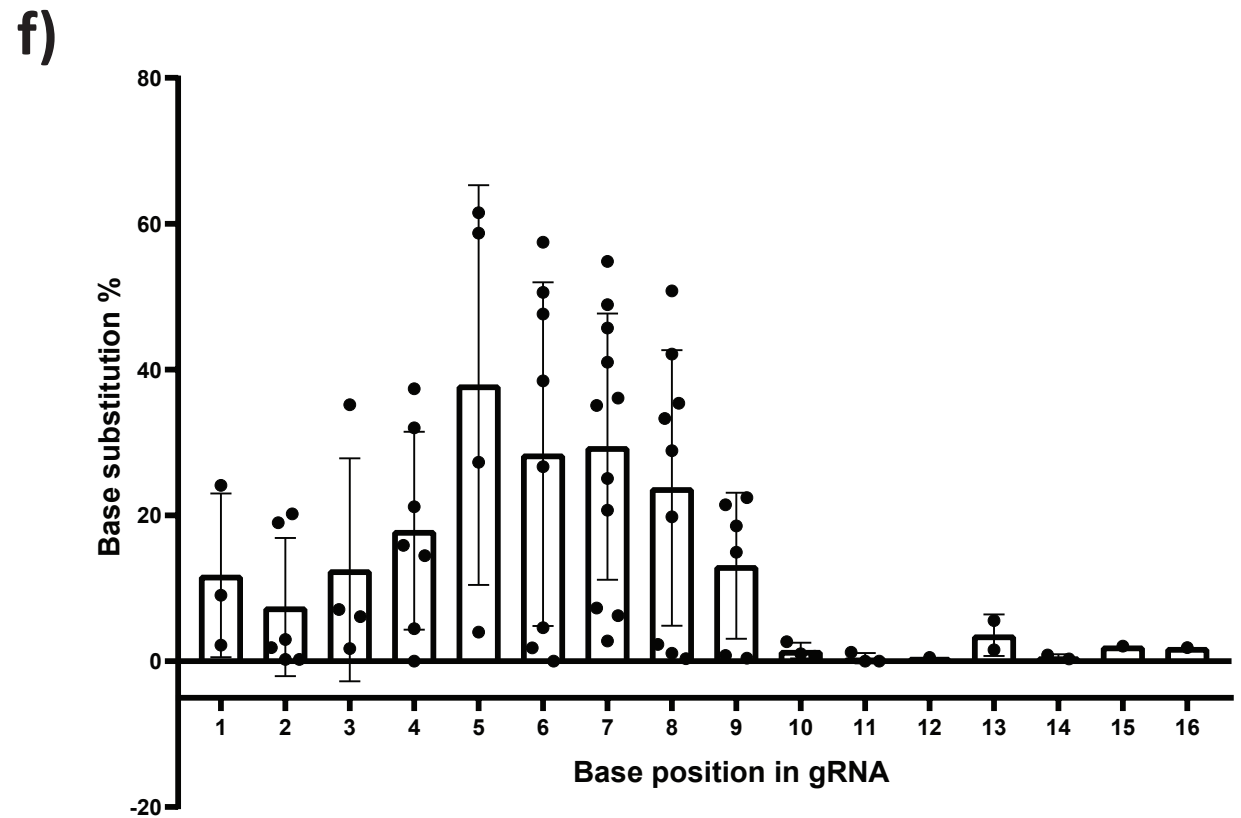

Supplement: supp [file elife-65421-supp-v1.zip]
